# Supplementary material
Source: PubMed Central journal article supplement (PMC4500273)

**1,2-dipalmitoylglycerol**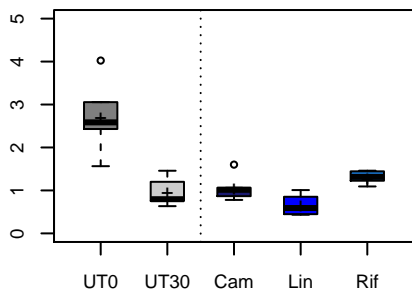**1-linoleoylglycerophosphocholine (18:2n6)**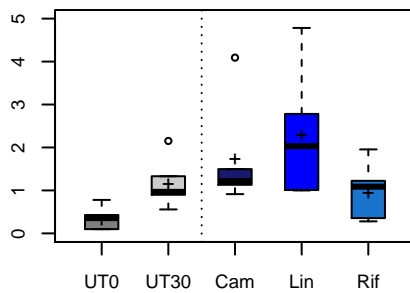**1-margaroylglycerol (1-monoheptadecanoin)**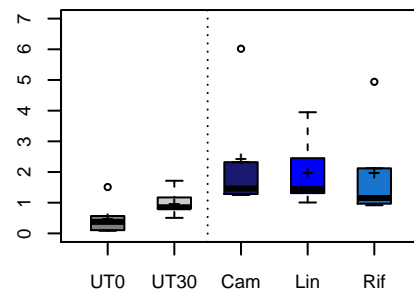**1-methyl-beta-carboline-3-carboxylic acid**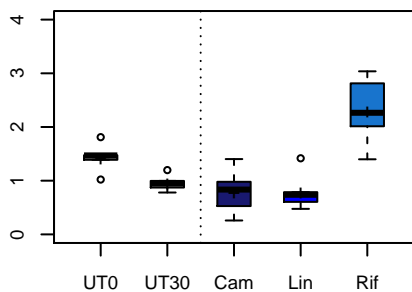**1-myristoylglycerol (1-monomyristin)**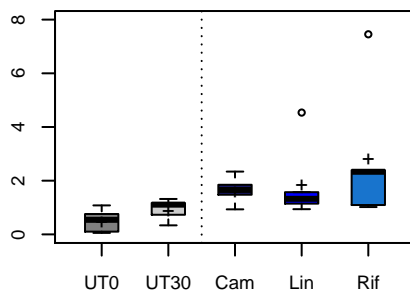**1-oleoylglycerol (1-monoolein)**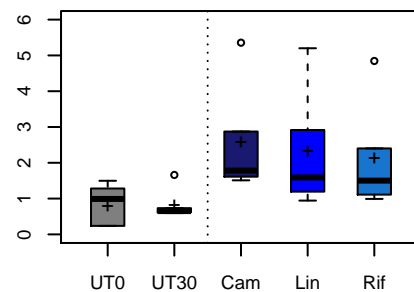**1-oleoylglycerophosphocholine (18:1)**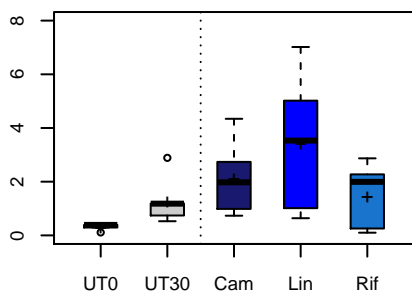**1-palmitoyl-3-myristoyl glycerol**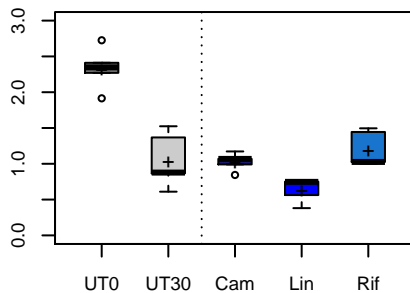**1-palmitoylglycerol (1-monopalmitin)**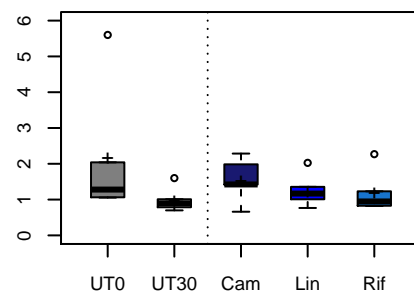**1-palmitoylglycerophosphate**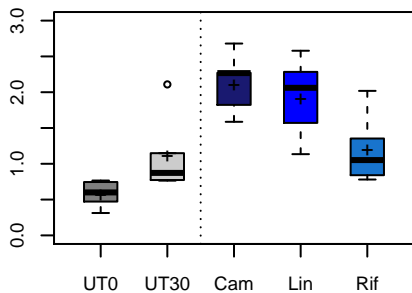**1-palmitoylglycerophosphocholine (16:0)**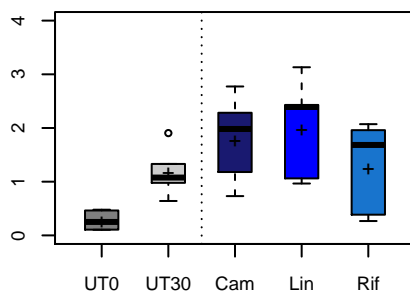**1-palmitoylglycerophosphoethanolamine**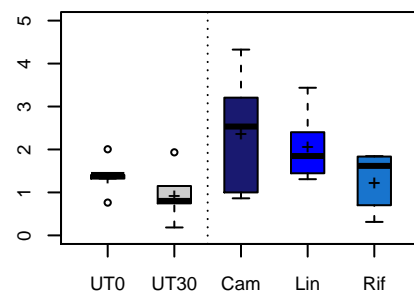**1-palmitoylglycerophosphoglycerol\***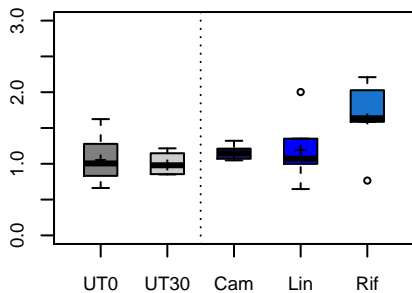**1-palmitoylglycerophosphoinositol\***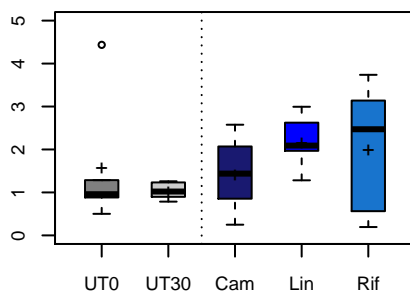**1-palmitoylglycerophosphoserine\***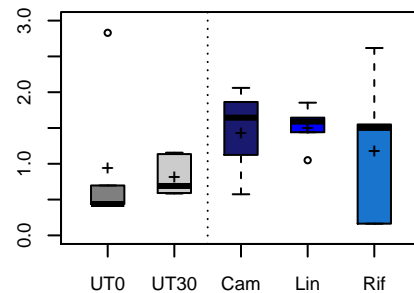

1-pentadecanoylglycerol (1-monopentadecanoin)

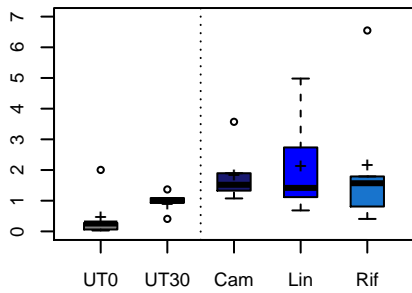

1-stearoylglycerol (1-monostearin)

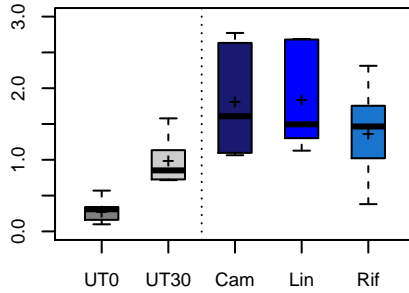

1-stearoylglycerophosphate

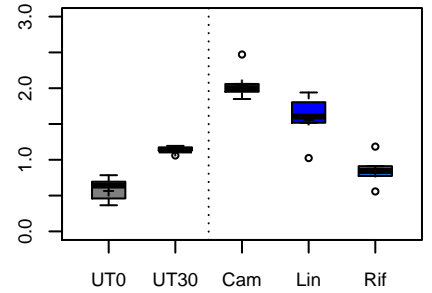

1-stearoylglycerophosphocholine (18:0)

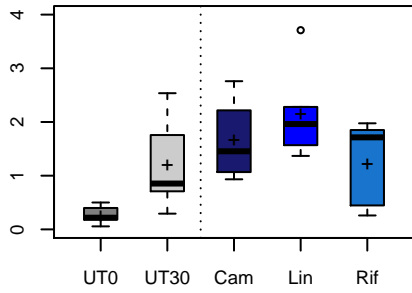

1-stearoylglycerophosphoglycerol

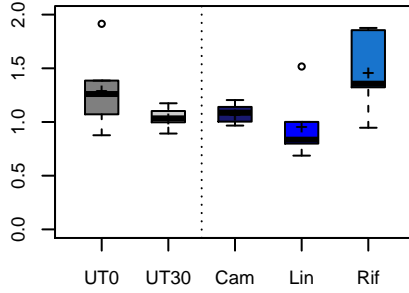

1-stearoylglycerophosphoinositol

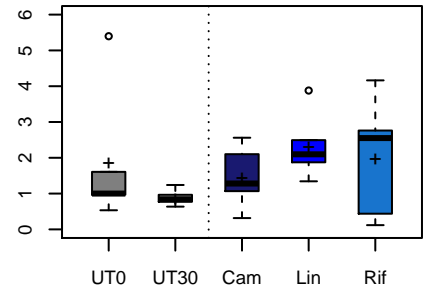

1-stearoylglycerophosphoserine\*

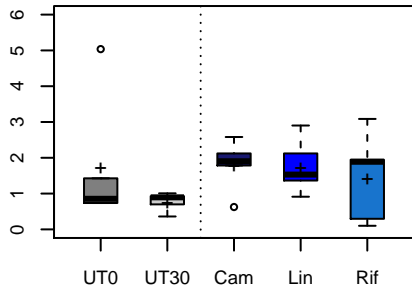

13-HODE + 9-HODE

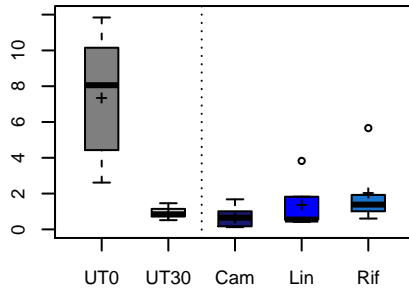

13-methylmyristic acid

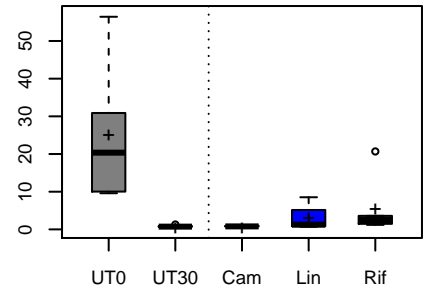

15-methylpalmitate (isobar with 2-methylpalmitate)

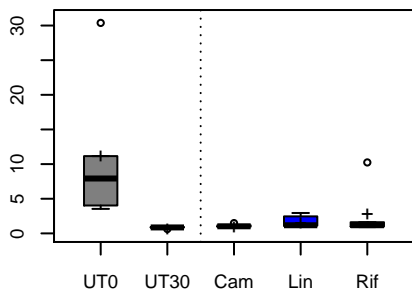

17-methylstearate

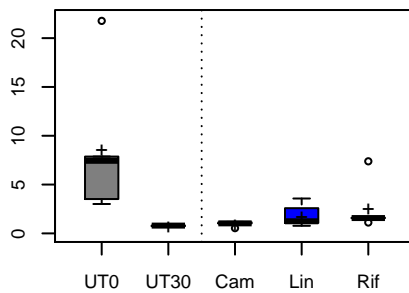

2'-deoxyadenosine

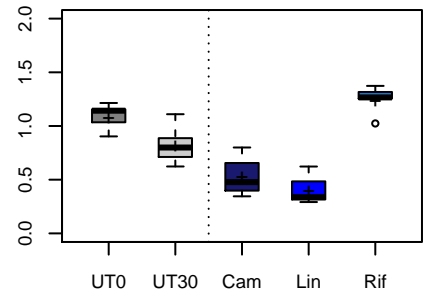

2'-deoxyadenosine 3'-monophosphate

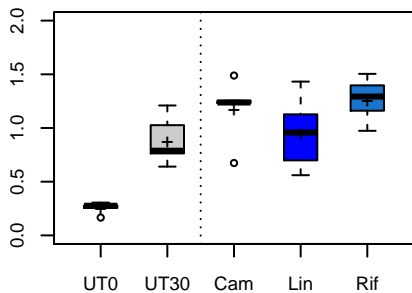

2'-deoxyadenosine 5'-diphosphate

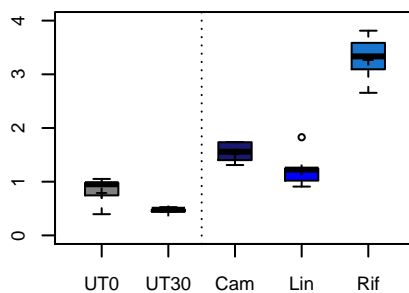

2'-deoxyadenosine 5'-monophosphate

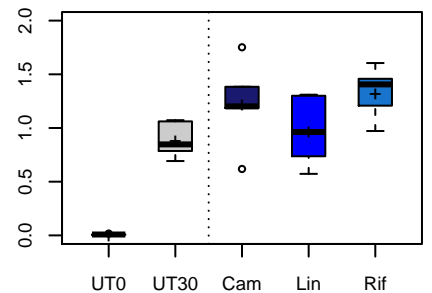

**2'-deoxyadenosine 5'-triphosphate**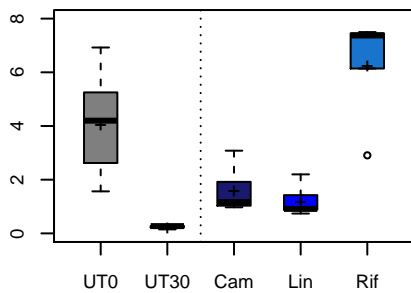**2'-deoxycytidine**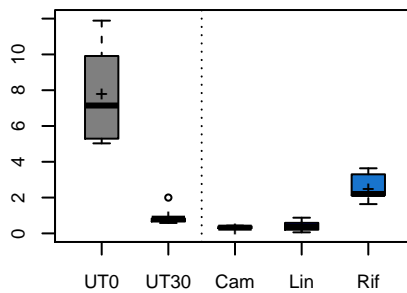**2'-deoxycytidine 5'-monophosphate**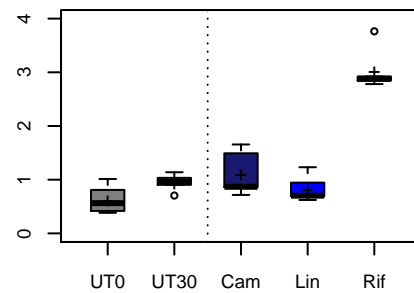**2'-deoxyguanosine**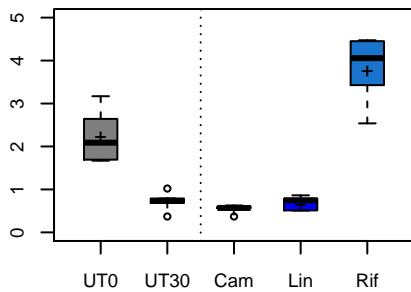**2'-deoxyguanosine 5'-monophosphate (dGMP)**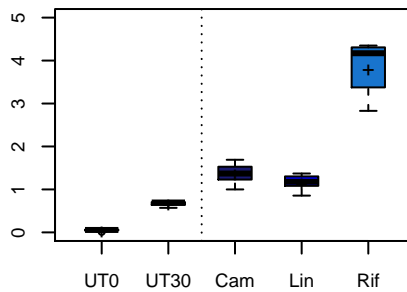**2'-deoxyinosine**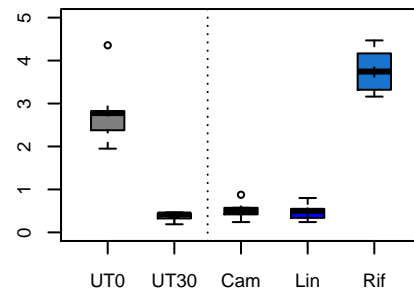**2'-deoxyuridine**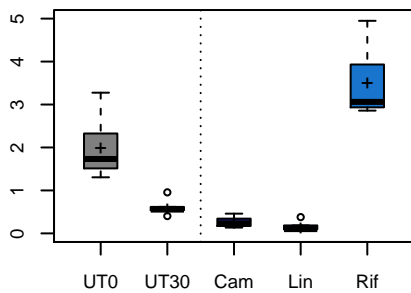**2,3-dihydroxyisovalerate**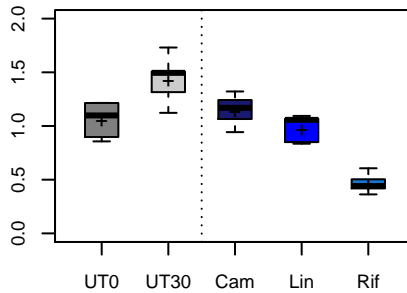**2-aminoadipate**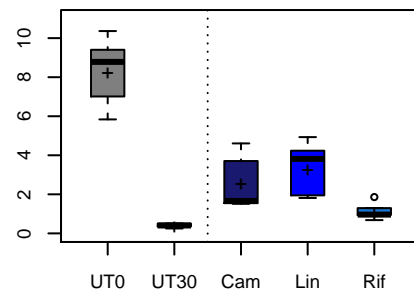**2-aminobutyrate**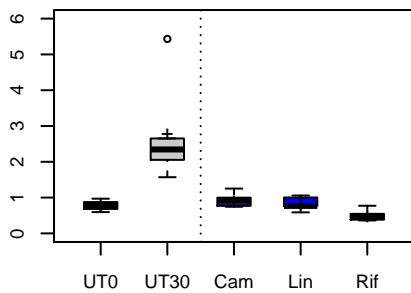**2-hydroxy-3-methylvalerate**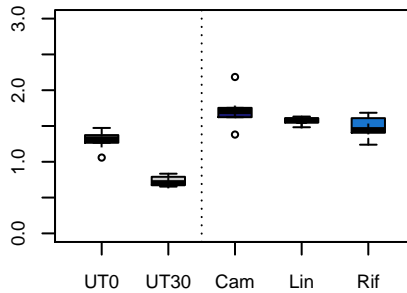**2-hydroxybutyrate (AHB)**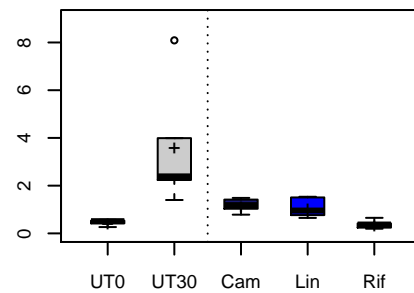**2-hydroxyglutarate**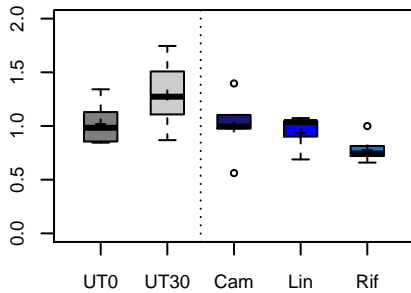**2-isopropylmalate**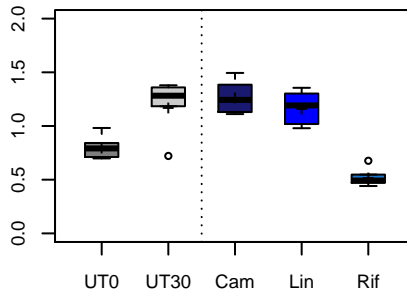**2-myristoylglycerol (2-monomyristin)**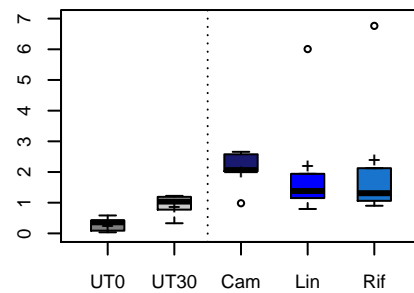

**2-palmitoylglycerol (2-monopalmitin)**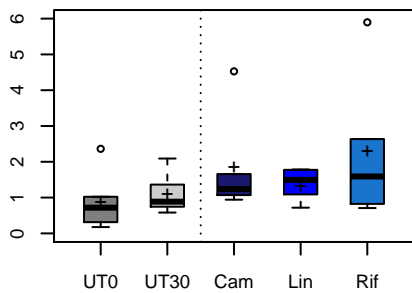**2-palmitoylglycerophosphocholine\***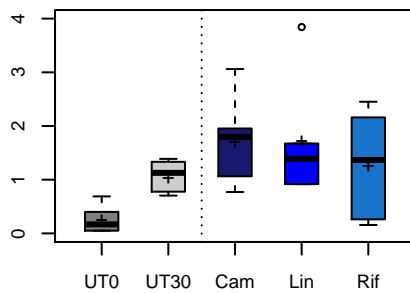**2-palmitoylglycerophosphoglycerol\***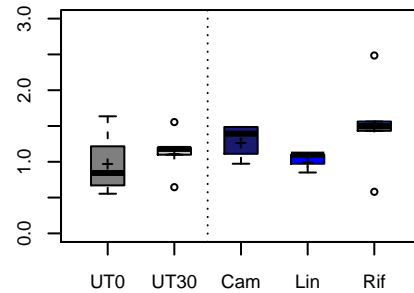**2-phosphoglycerate**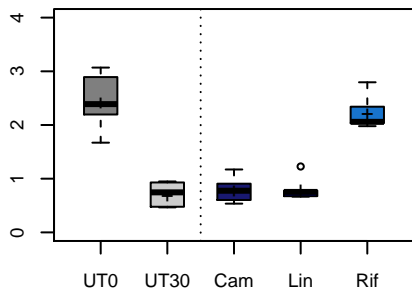**2-piperidinone**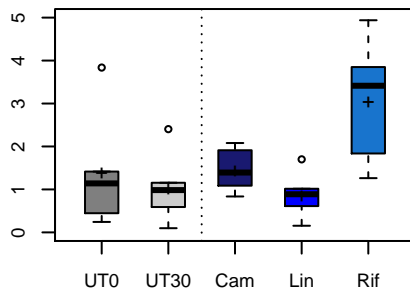**2-stearoylglycerol (2-monostearin)**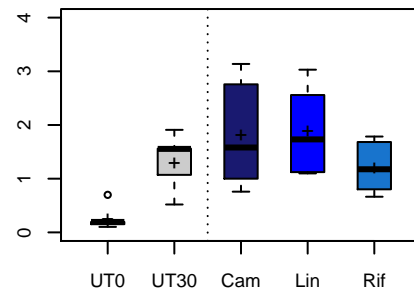**2-stearoylglycerophosphoglycerol\***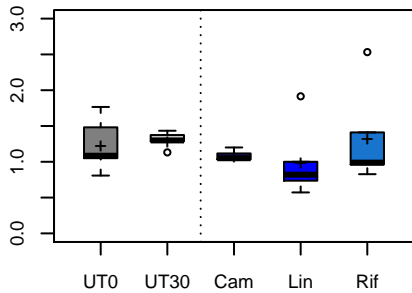**3-(4-hydroxyphenyl)lactate**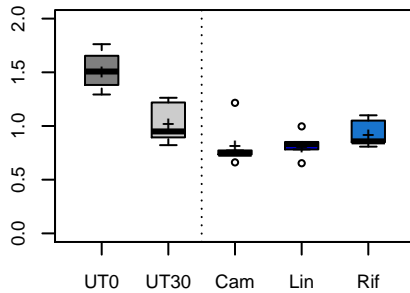**3-hydroxy-3-methylglutarate**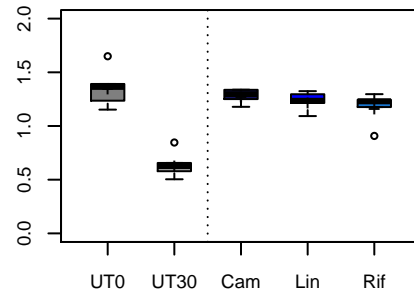**3-hydroxy-3-methylglutaryl CoA**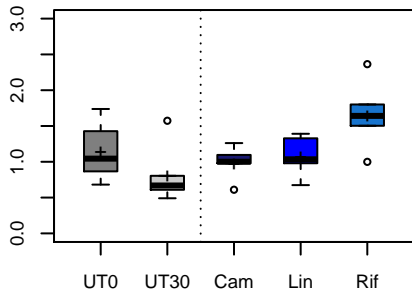**3-hydroxybutyrate (BHBA)**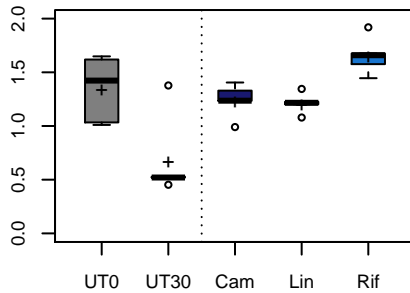**3-hydroxydecanoate**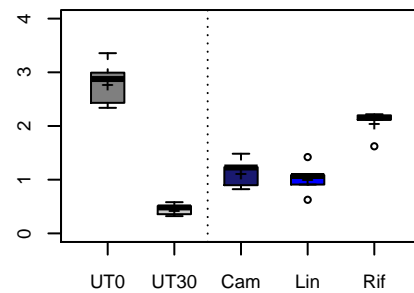**3-hydroxymyristate**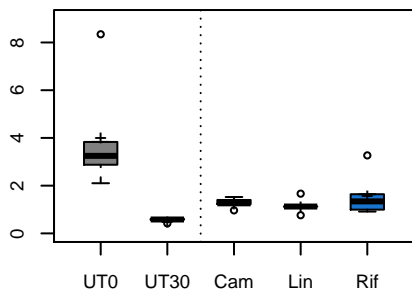**3-hydroxyoctanoate**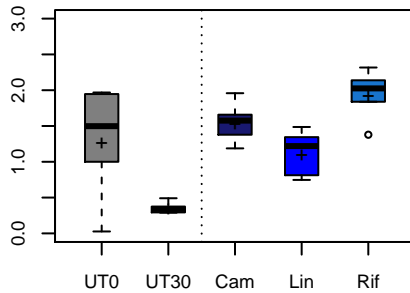**3-phosphoglycerate**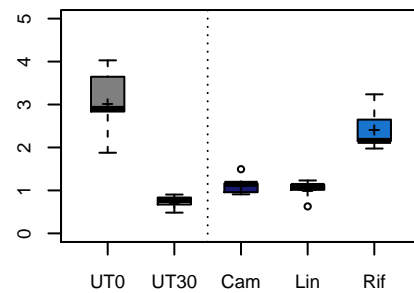

**3-phosphoserine**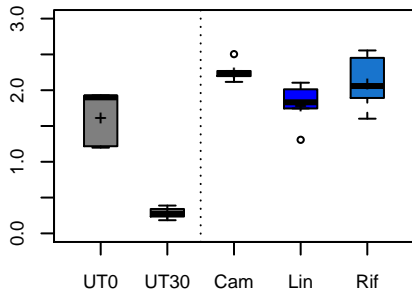**4-guanidinobutanoate**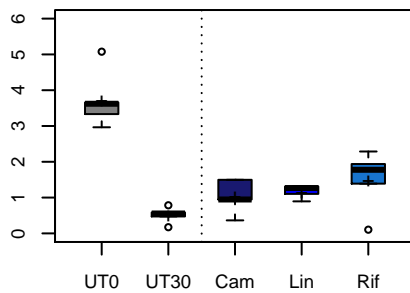**4-hydroxybutyrate (GHB)**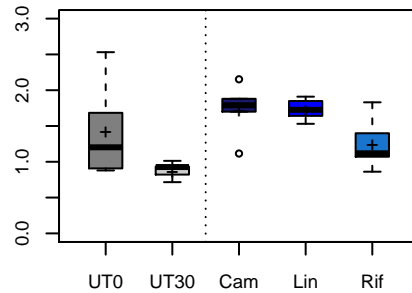**4-hydroxyphenylpyruvate**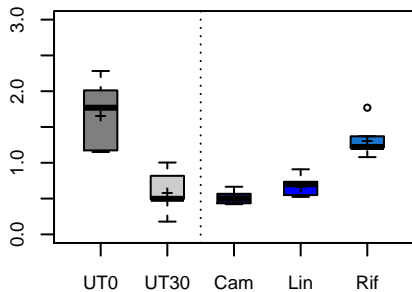**4-methyl-2-oxopentanoate**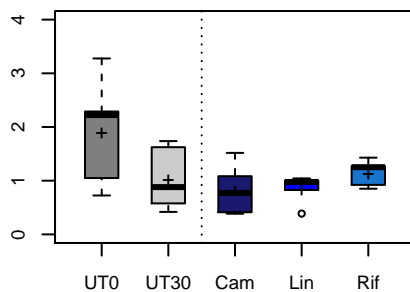**5-(2-Hydroxyethyl)-4-methylthiazole**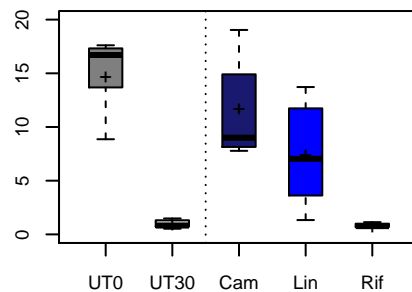**5-hydroxyhexanoate**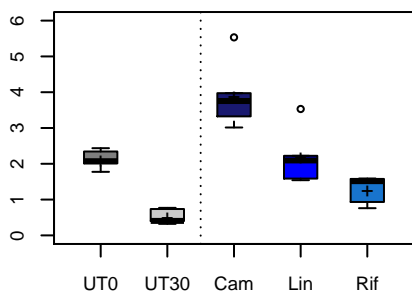**5-methylthioadenosine (MTA)**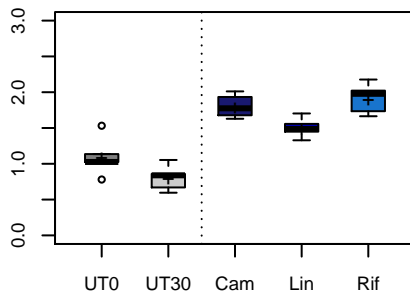**5-methyluridine (ribothymidine)**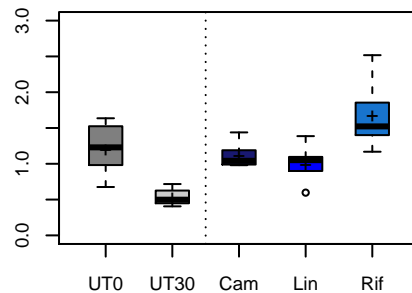**5-oxoproline**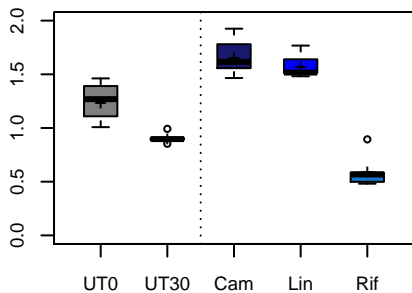**6-phosphogluconate**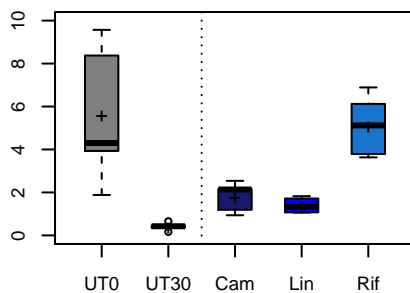**7,8-dihydroneopterin**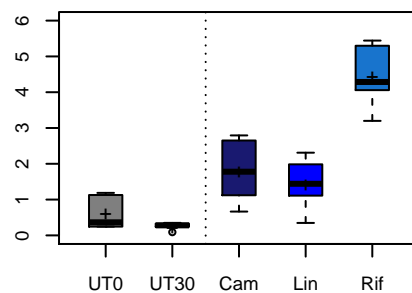**7-methylguanine**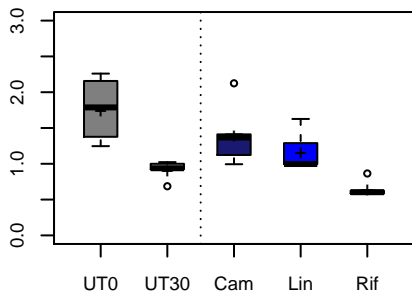**N-acetyl-beta-alanine**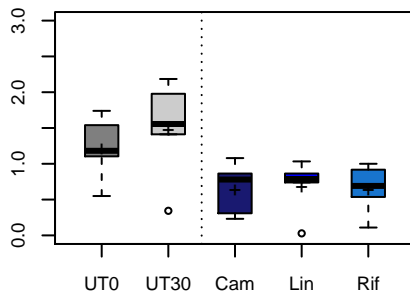**N-acetyl-glucosamine 1-phosphate**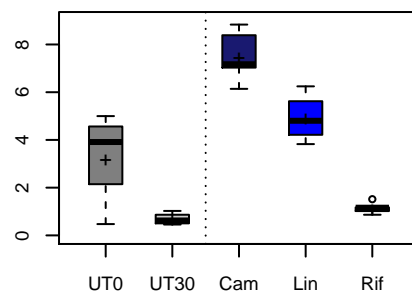

**N-acetylanaline**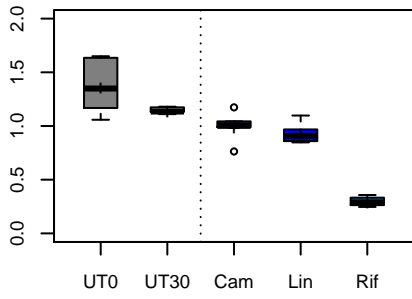**N-acetylarginine**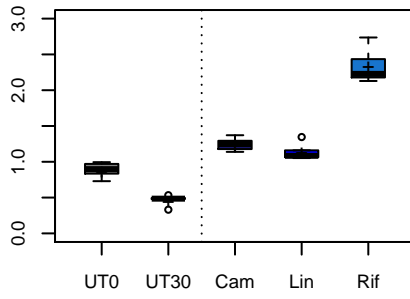**N-acetylaspargine**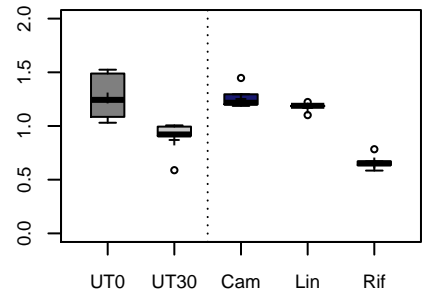**N-acetylaspartate (NAA)**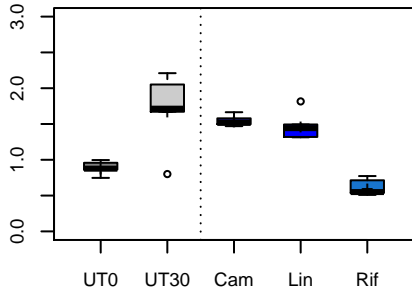**N-acetylglucosamine**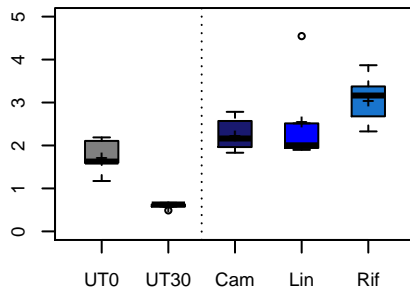**N-acetylglutamate**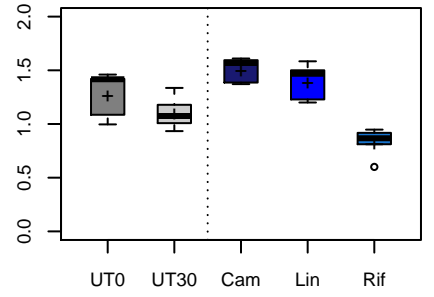**N-acetylglutamine**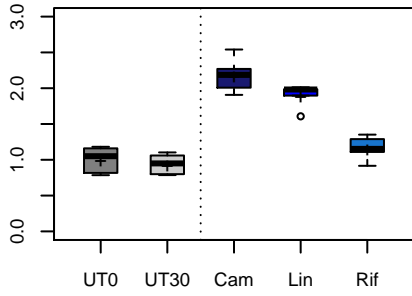**N-acetylglycine**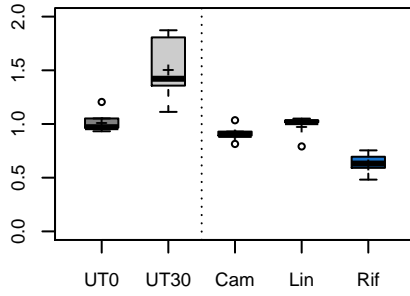**N-acetylhistidine**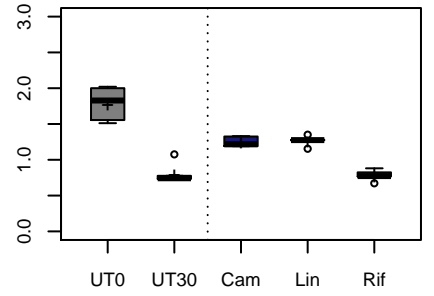**N-acetylisoleucine**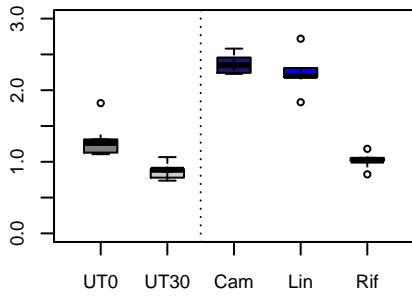**N-acetylleucine**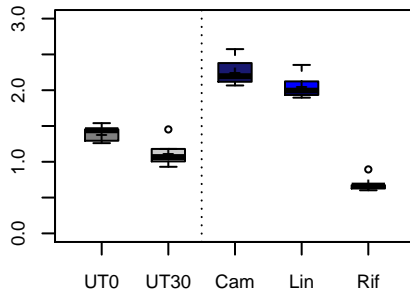**N-acetylmethionine**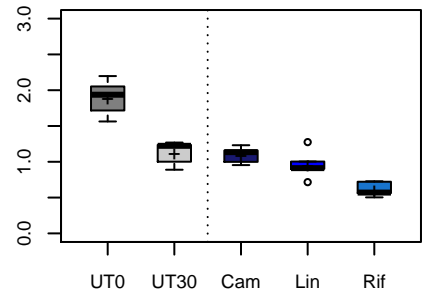**N-acetylmethionine sulfoxide**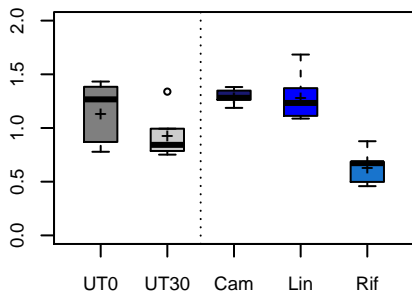**N-acetylneuraminat**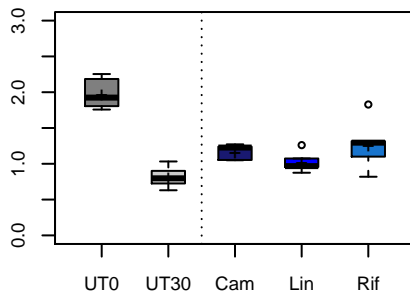**N-acetylphenylalanine**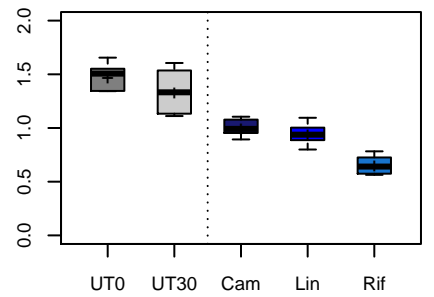

**N-acetylproline**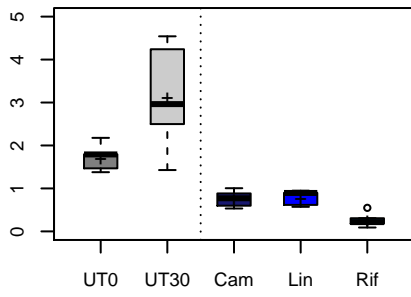**N-acetylputrescine**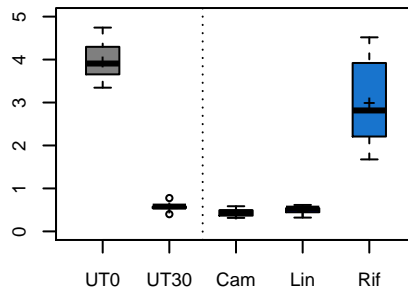**N-acetyls erine**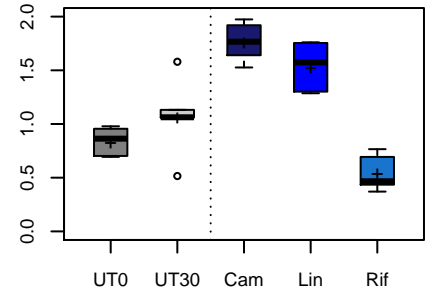**N-acetylthreonine**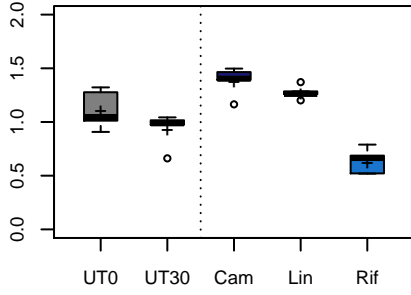**N-acetyltryptophan**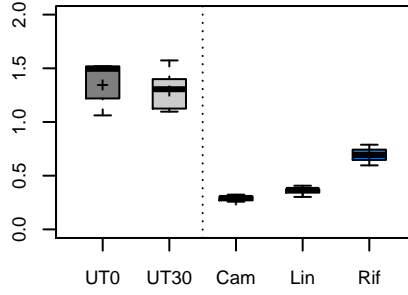**N-acetyltyrosine**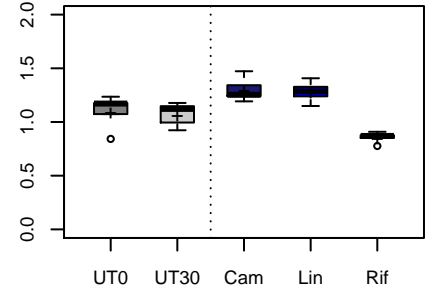**N-acetylvaline**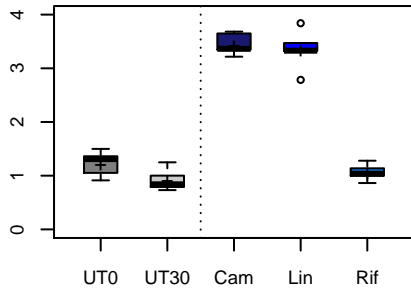**N-alpha-acetylornithine**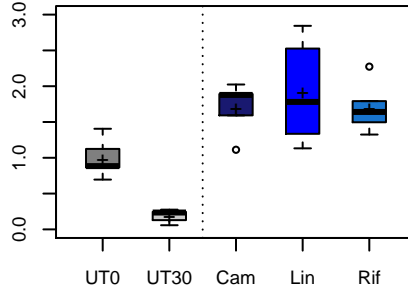**N-carbamoylaspartate**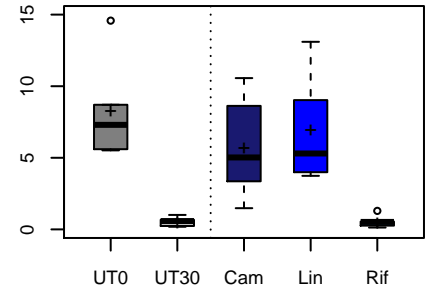**N-delta-acetylornithine**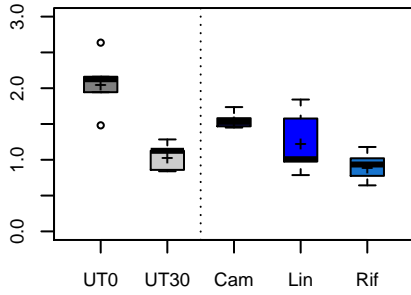**N-formylmethionine**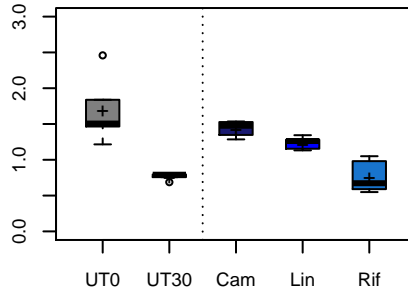**N-glycolylneuramate**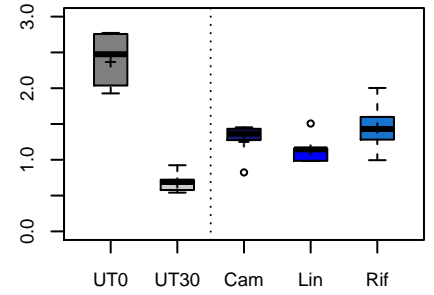**N-propionylmethionine**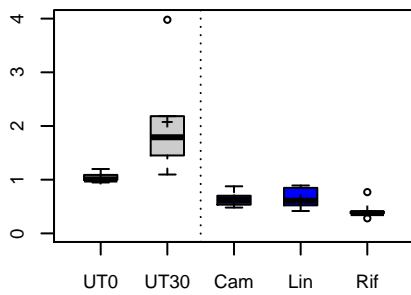**N2-acetyllysine**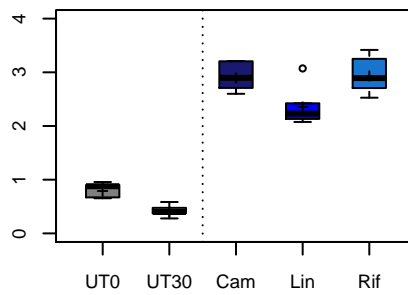**N2-methylguanosine**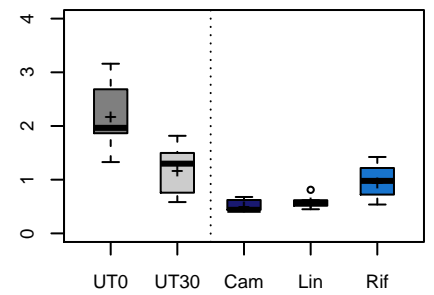

**N6,N6-dimethyladenosine**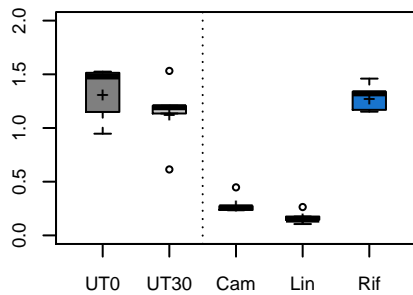**N6-acetyllysine**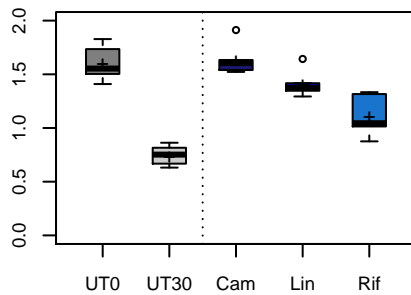**N6-succinyladenosine**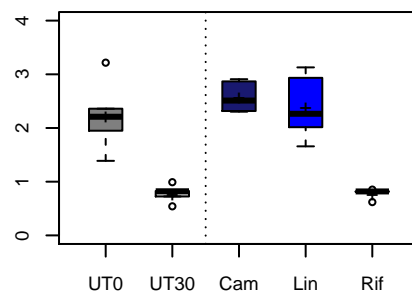**O-acetylserine**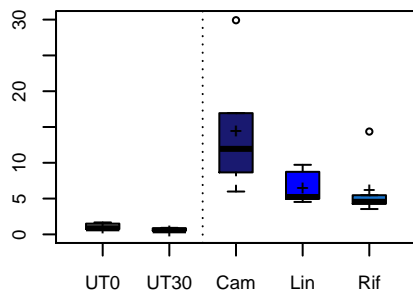**O-methyl tyrosine**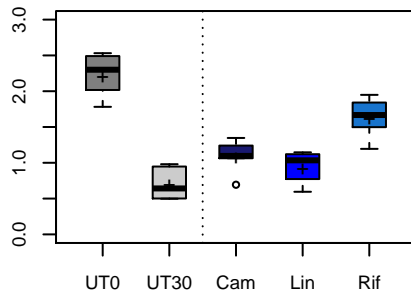**R-mevalonate 5-phosphate**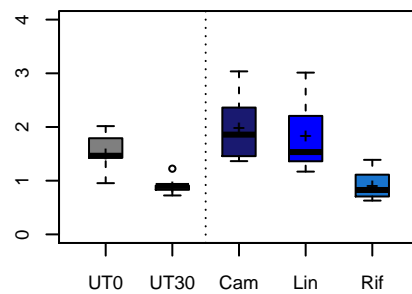**S-adenosylhomocysteine (SAH)**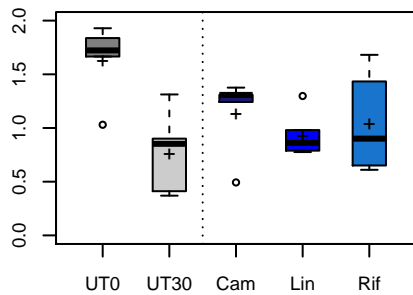**S-methylcysteine**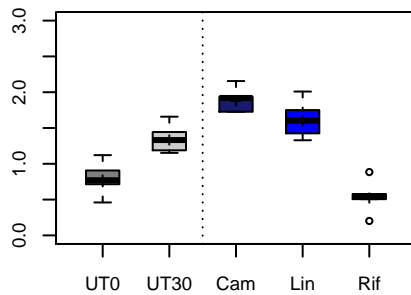**UDP-N-acetylgalactosamine**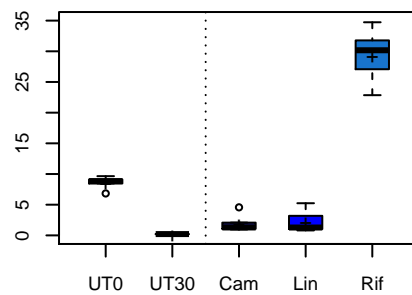**UDP-N-acetylglucosamine**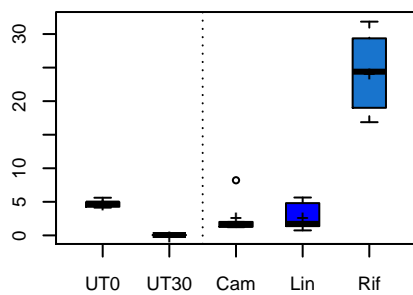**UDP-glucose**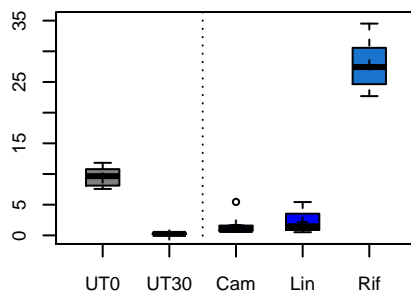**acetoacetate**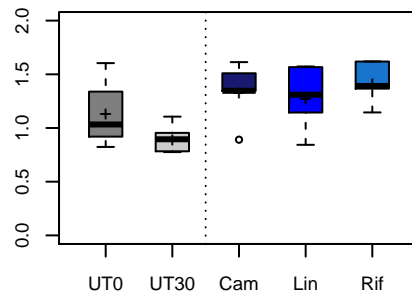**acetyl CoA**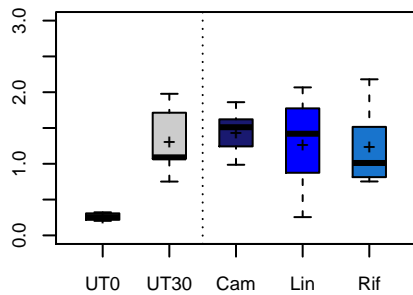**acetylphosphate**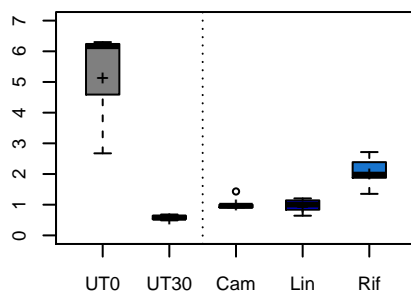**adenine**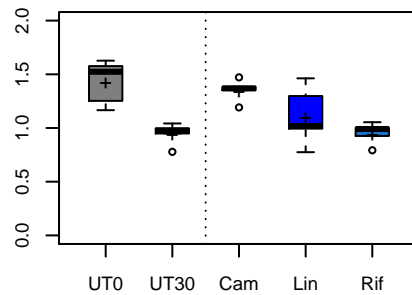



**adenosine**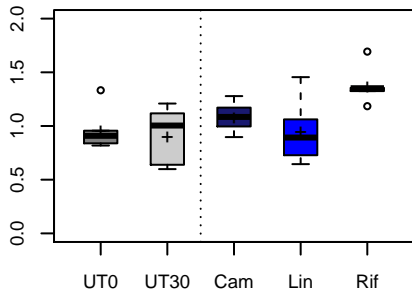**adenosine 2'-monophosphate (2'-AMP)**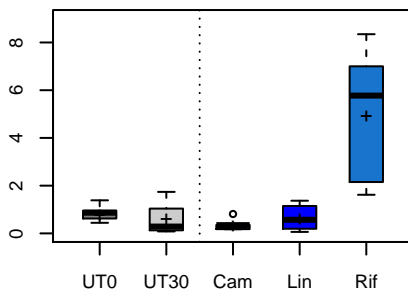**adenosine 3'-monophosphate (3'-AMP)**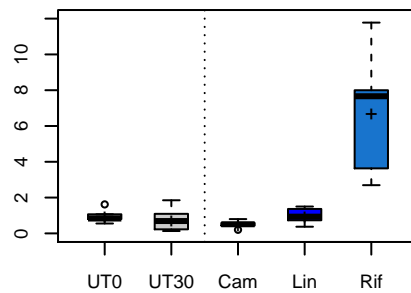**adenosine 5'-diphosphate (ADP)**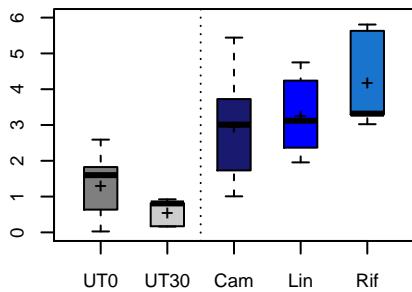**adenosine 5'-diphosphoribose (ADP-ribose)**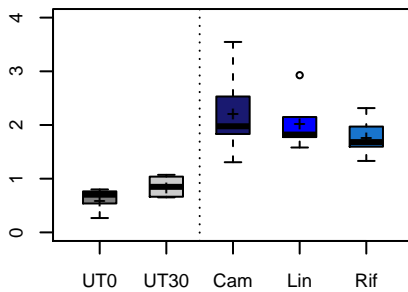**adenosine 5'-monophosphate (AMP)**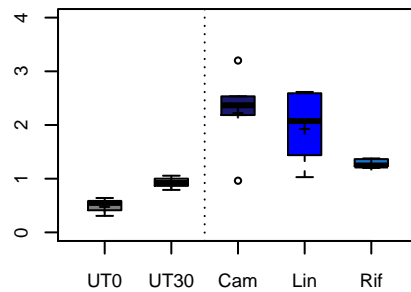**adenosine-2',3'-cyclic monophosphate**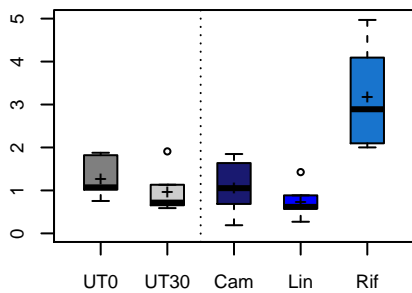**adenylosuccinate**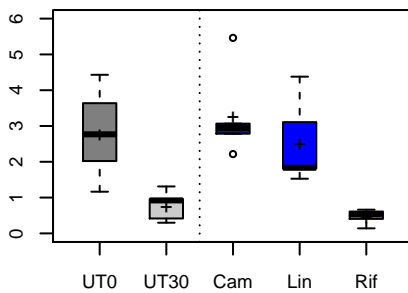**alanine**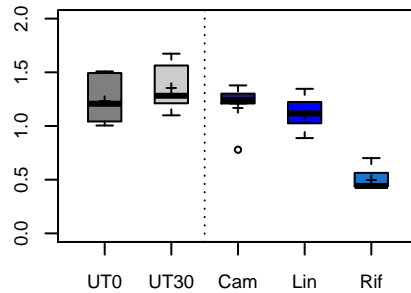**alanylalanine**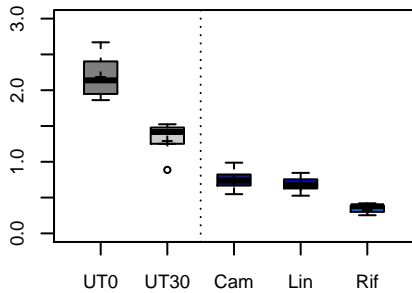**allo-threonine**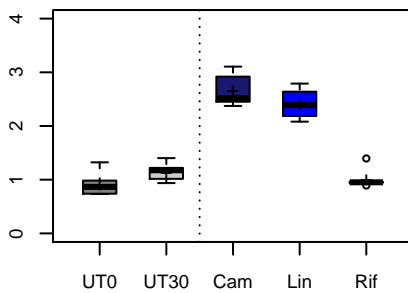**alpha-glutamylglutamate**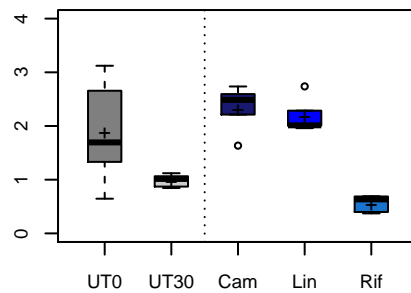**alpha-hydroxyisocaproate**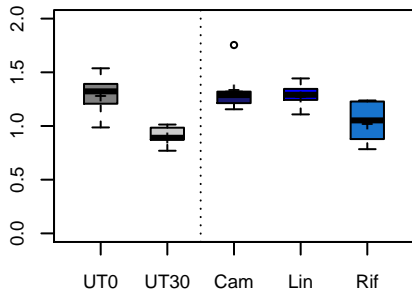**alpha-hydroxyisovalerate**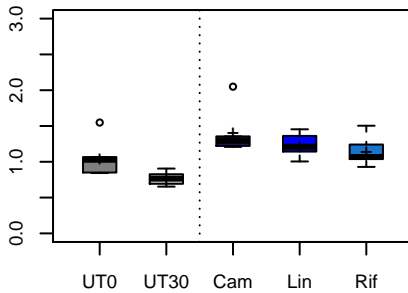**alpha-ketoglutarate**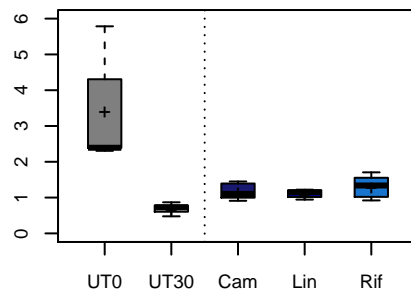

**arachidate (20:0)**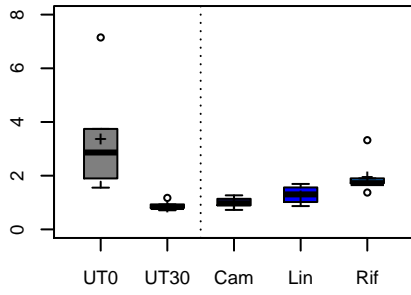**arginine**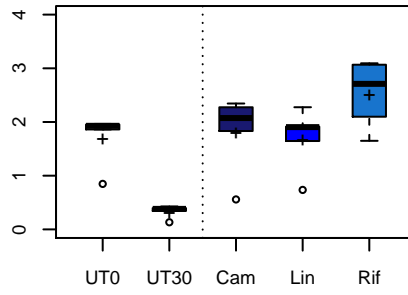**asparagine**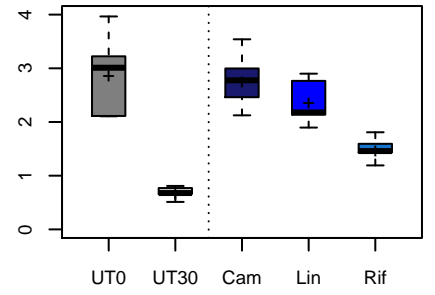**aspartate**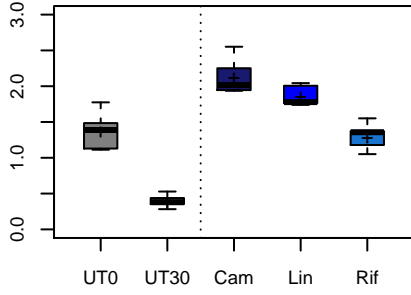**aspartylglutamine**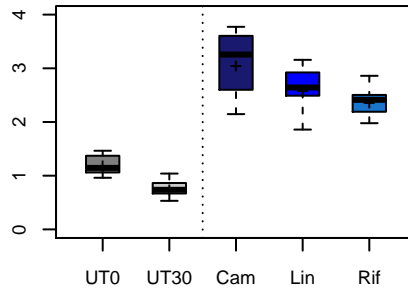**aspartylleucine**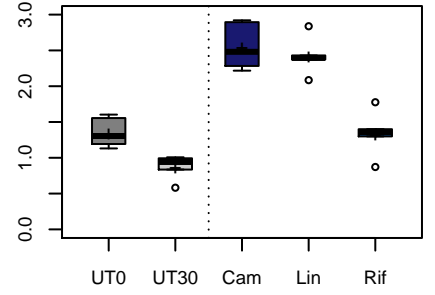**benzoate**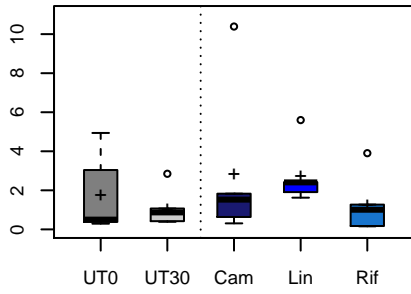**beta-alanine**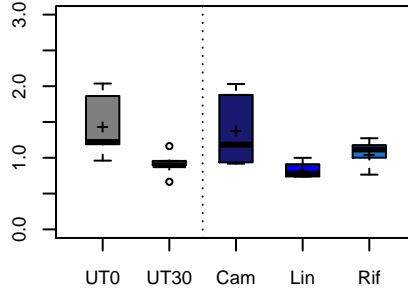**beta-hydroxyisovaleroylcarnitine**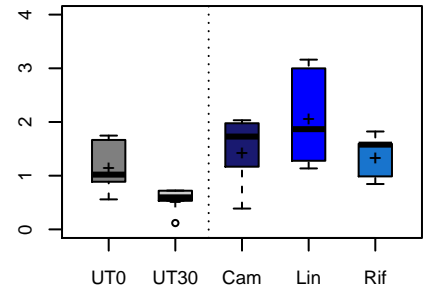**betaine**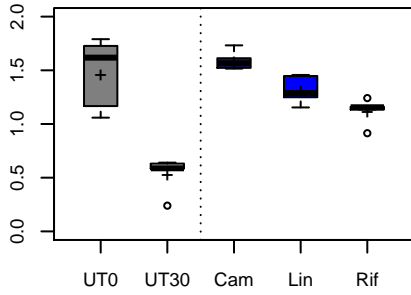**biocytin**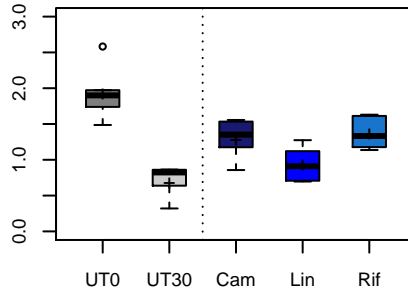**biotin**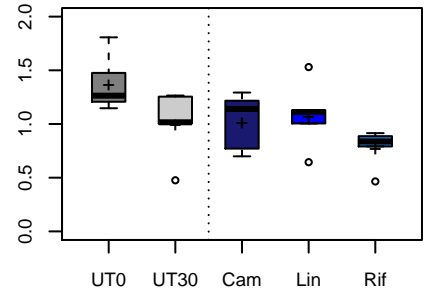**caproate (6:0)**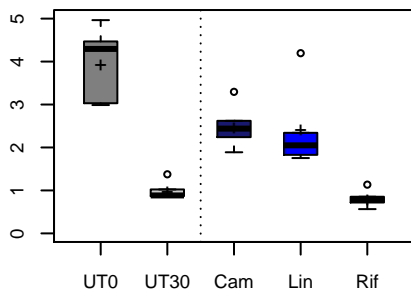**caprylate (8:0)**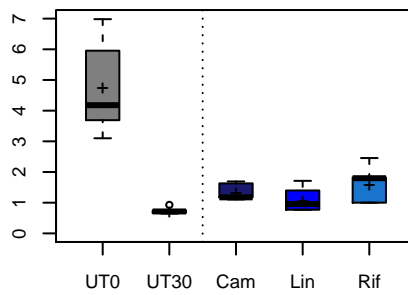**choline**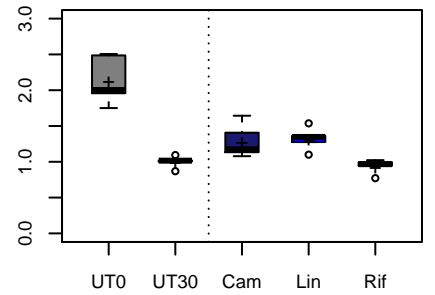

**chorismate**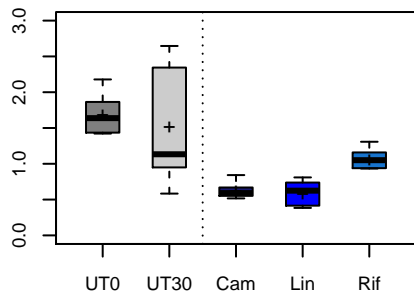**cis-Cyclo[L-ala-L-Pro]**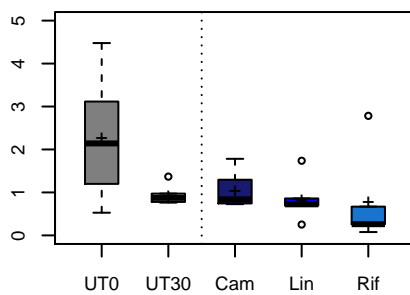**cis-urocanate**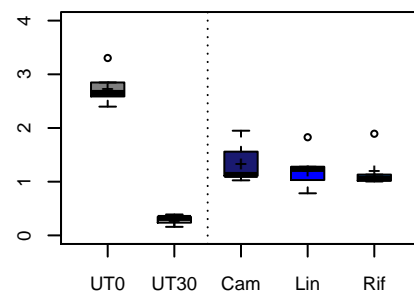**citrate**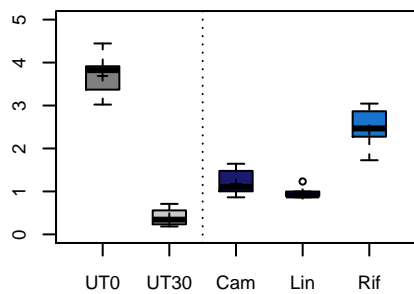**citrulline**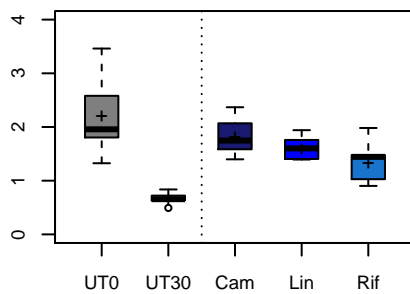**coenzyme A**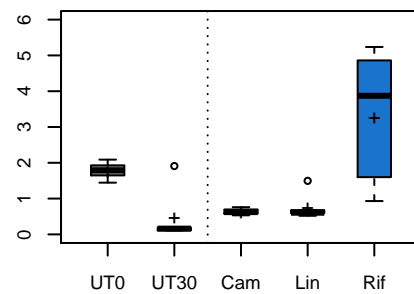**cyano-alanine**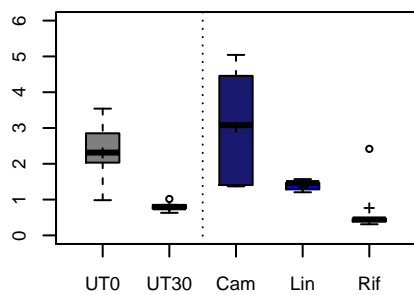**cyclo(L-phe-D-pro)\***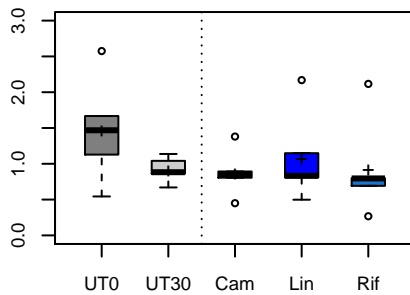**cyclo(L-phe-L-pro)**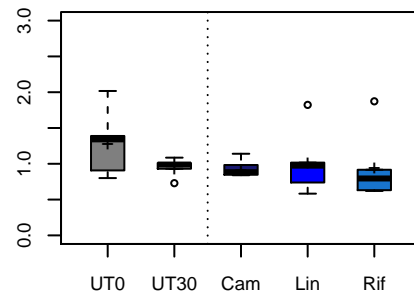**cyclo(gly-pro)**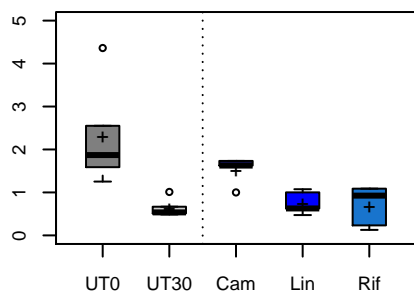**cyclo(leu-gly)**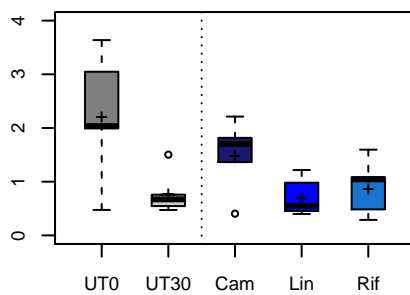**cyclo(leu-pro)**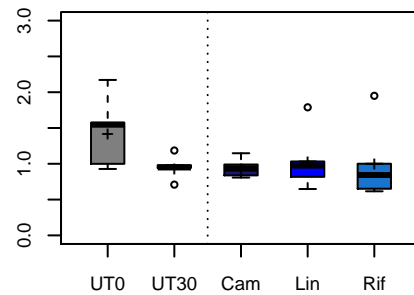**cyclo(pro-tyr)**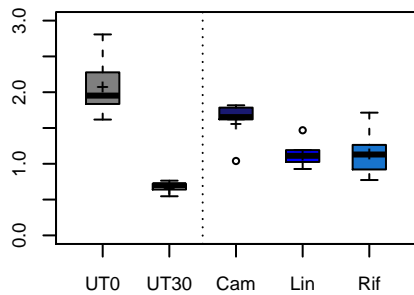**cystathionine**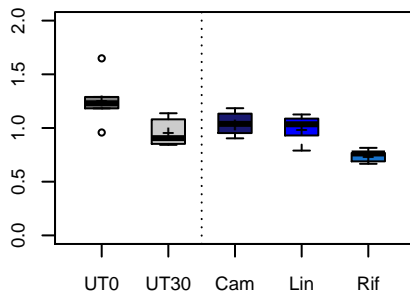**cysteine**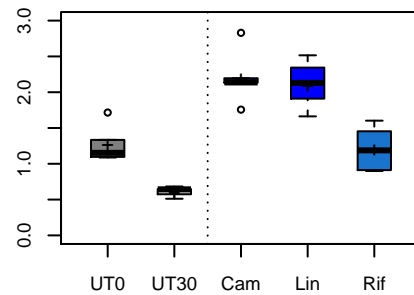

cytidine

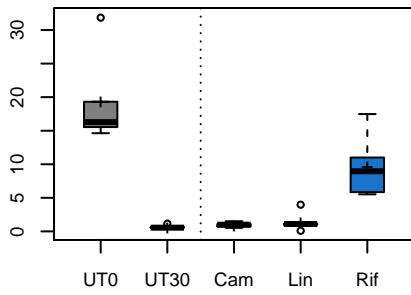

cytidine 5'-monophosphate (5'-CMP)

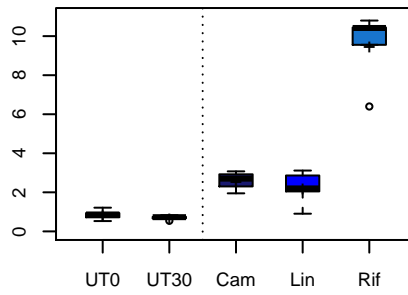

cytidine diphosphate

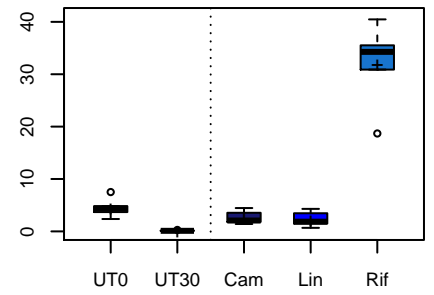

cytidine-5'-diphosphoglycerol

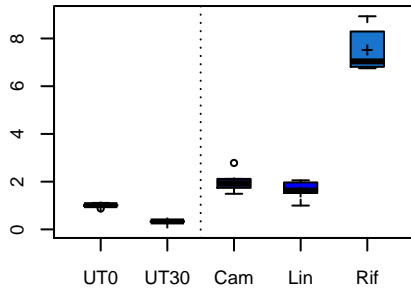

cytosine

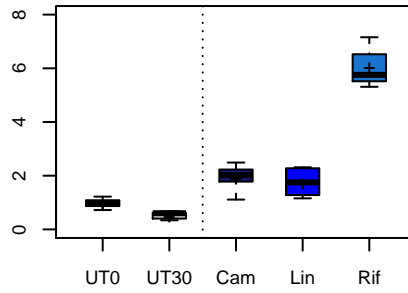

daidzein

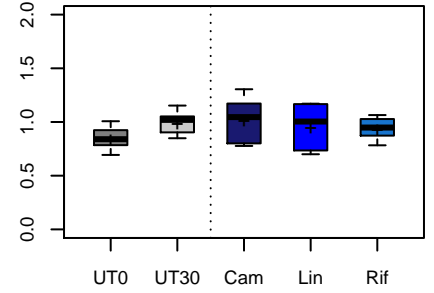

dihomo-linoleate (20:2n6)

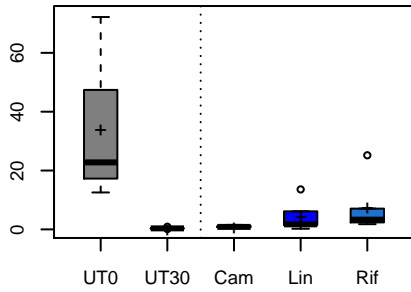

dihomolinenate (20:3n3 or n6)

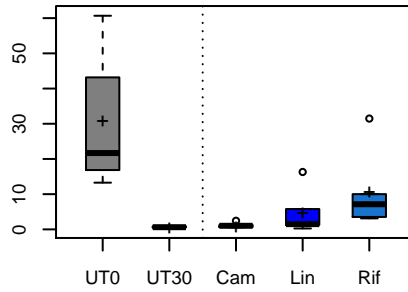

dimethylglycine

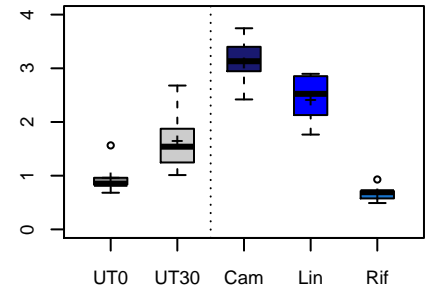

dimethylmalonic acid

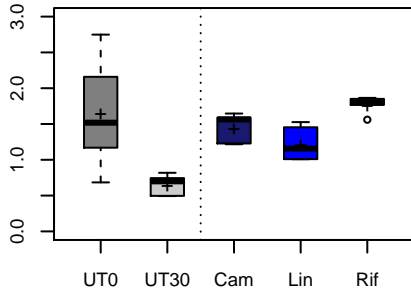

docosadienoate (22:2n6)

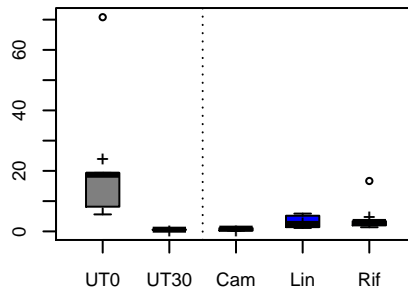

docosatrienoate (22:3n3)

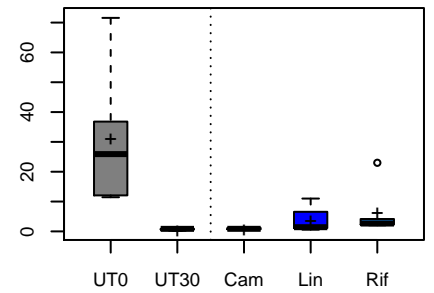

ectoine

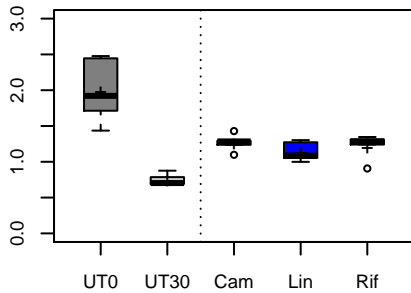

eicosenoate (20:1n9 or 11)

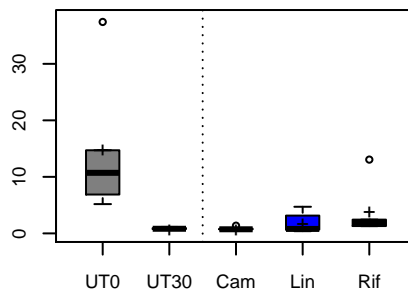

ergosterol

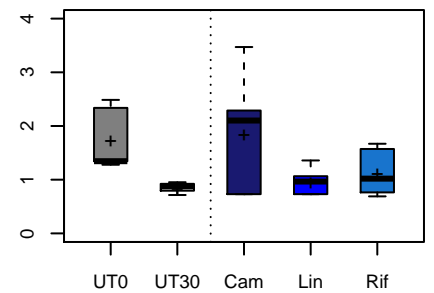

**ergothioneine**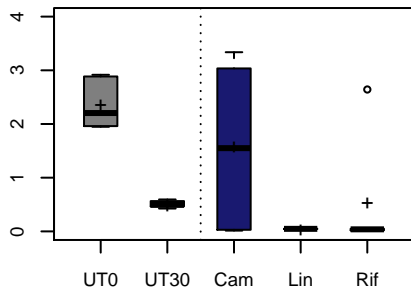**erucamide**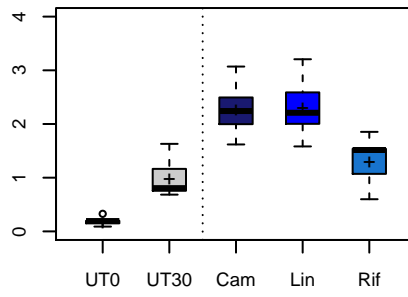**erucate (22:1n9)**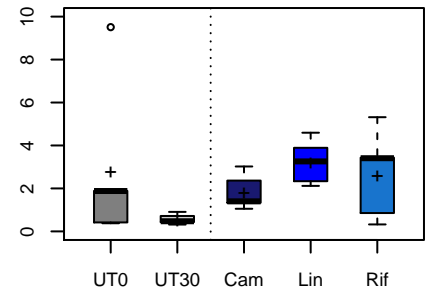**erythronate\***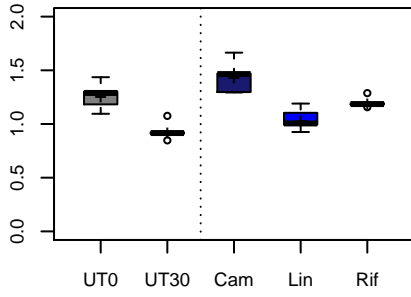**ethanolamine**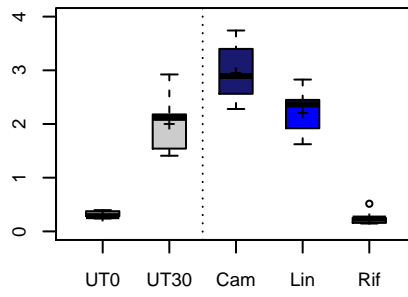**flavin adenine dinucleotide (FAD)**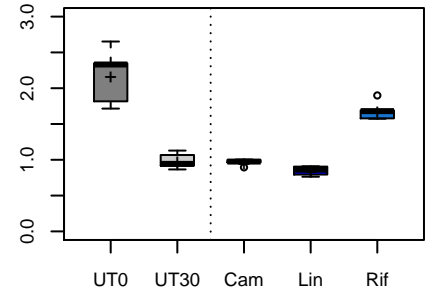**flavin mononucleotide (FMN)**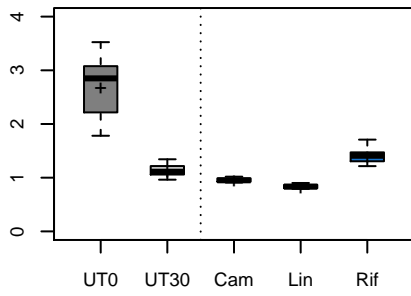**formiminoglutamate**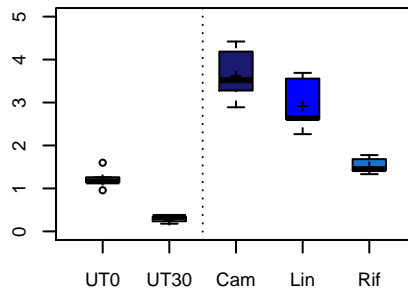**fructose 1,6-bisphosphate**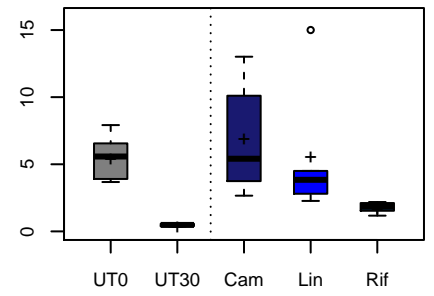**fumarate**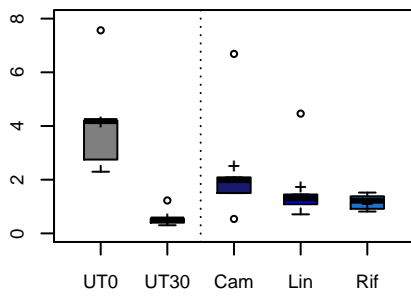**galactonate**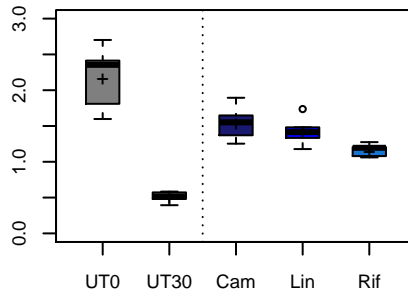**gamma-aminobutyrate (GABA)**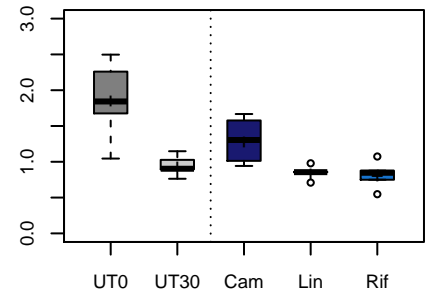**gamma-glutamyl-2-aminobutyrate**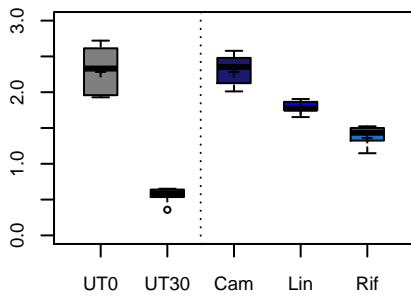**gamma-glutamylalanine**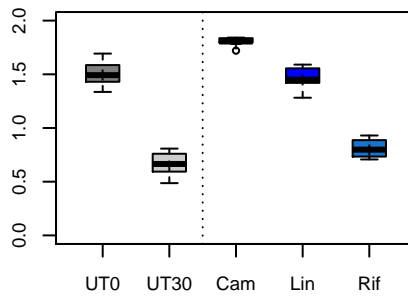**gamma-glutamylglutamate**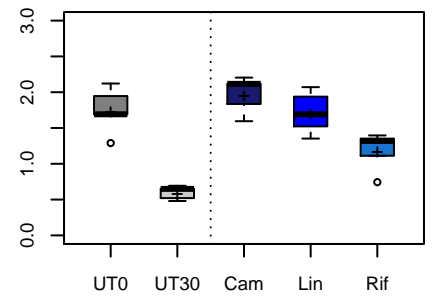

**gamma-glutamylglutamine**

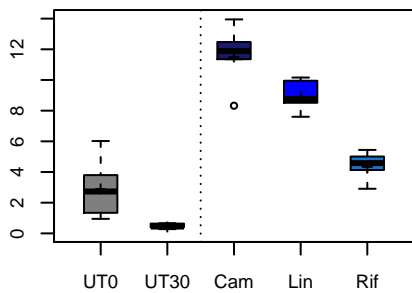

**gamma-glutamylisoleucine\***

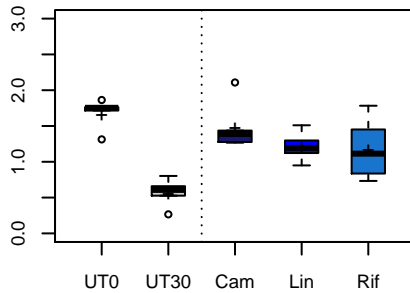

**gamma-glutamylleucine**

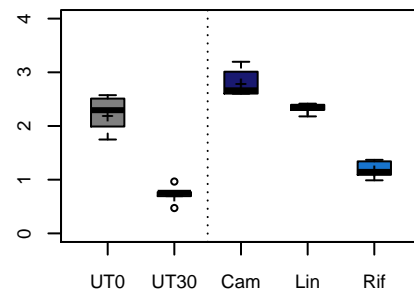

**gamma-glutamyllysine**

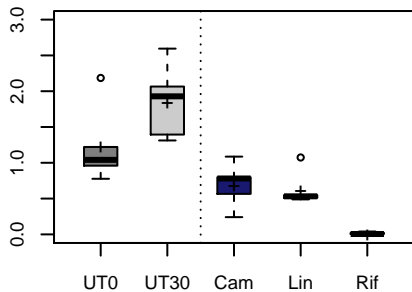

**gamma-glutamylmethionine**

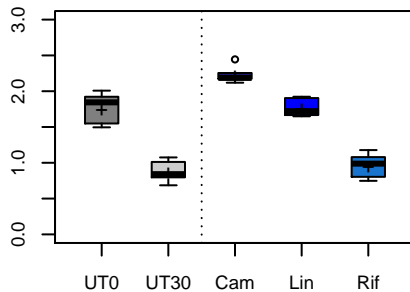

**gamma-glutamylphenylalanine**

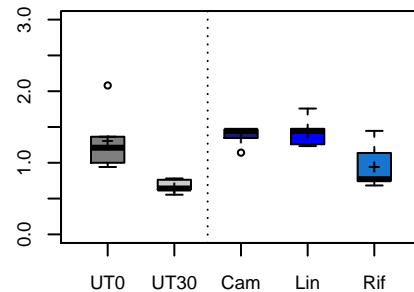

**gamma-glutamylvaline**

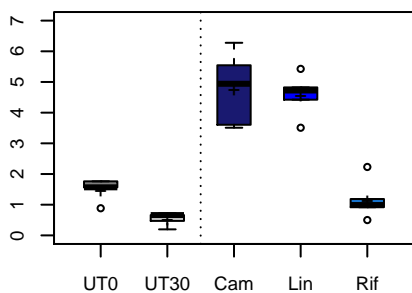

**genistein**

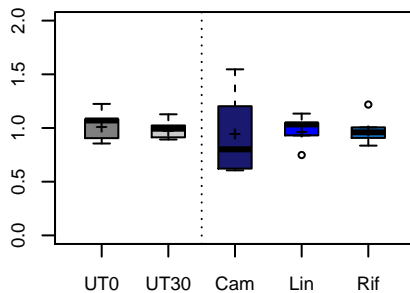

**glucosamine**

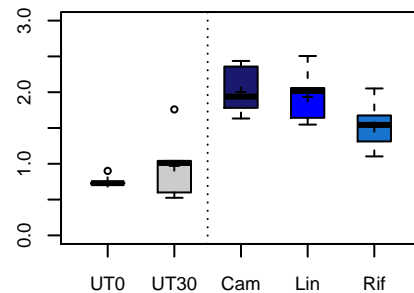

**glucosamine-6-phosphate**

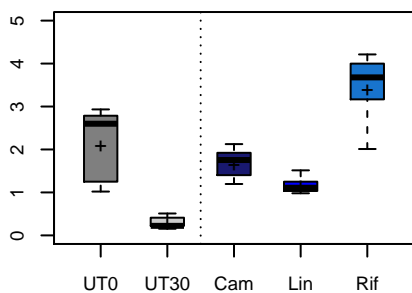

**glucose**

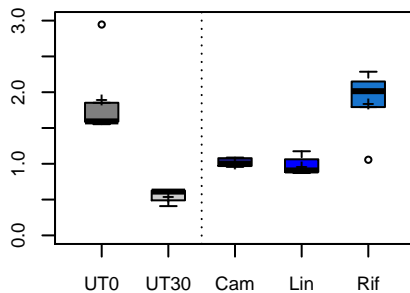

**glucose 1-phosphate**

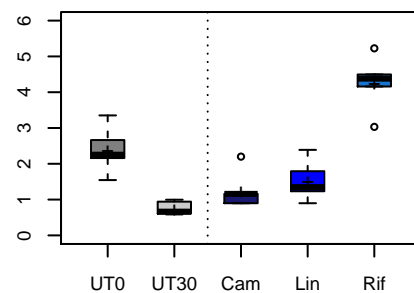

**glucose-6-phosphate (G6P)**

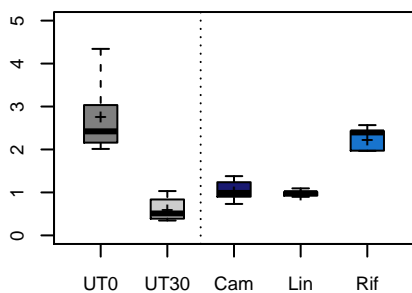

**glutamate**

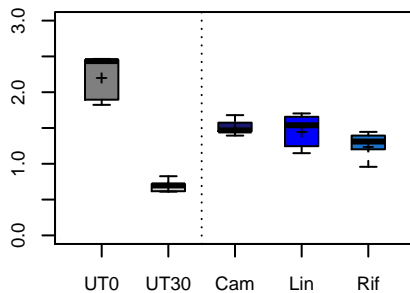

**glutamate, gamma-methyl ester**

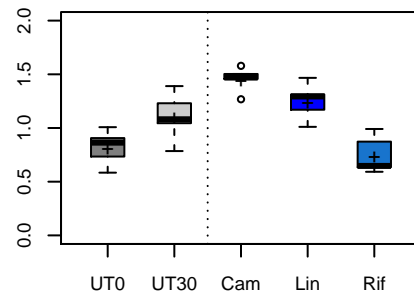

**glutamine**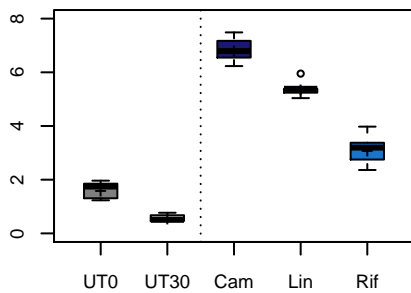**glycerate**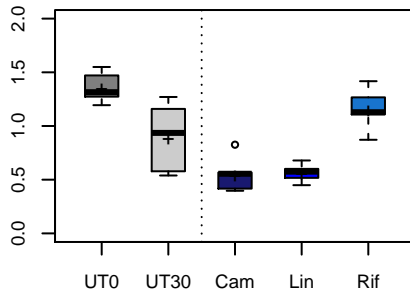**glycerol**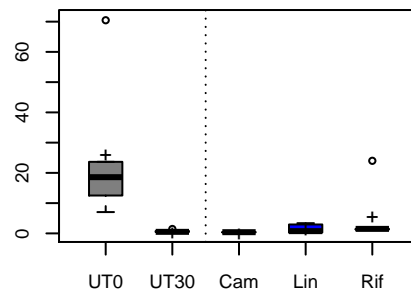**glycerol 2-phosphate**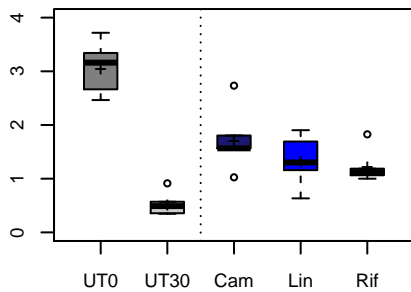**glycerol 3-phosphate (G3P)**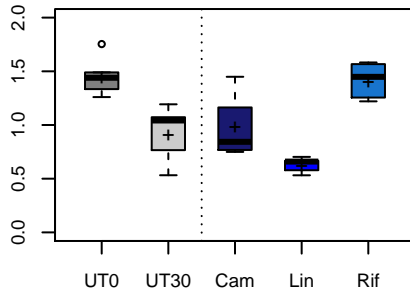**glycerophosphorylcholine (GPC)**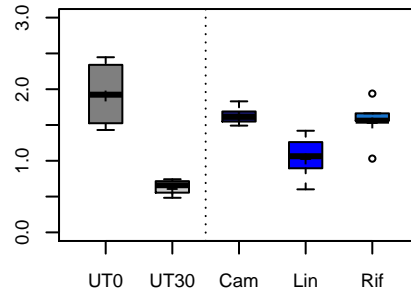**glycine**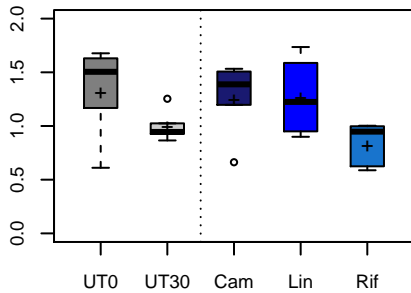**glycitein**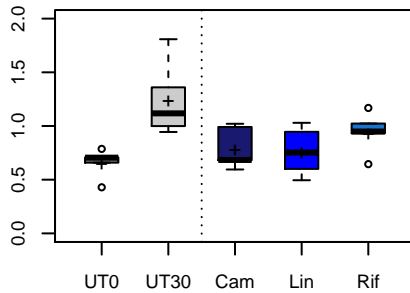**glycolate (hydroxyacetate)**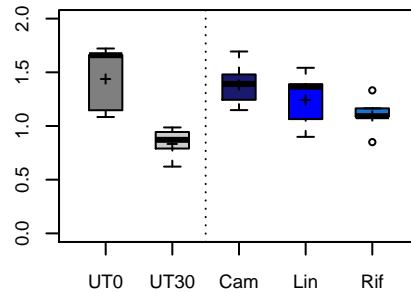**glycylisoleucine**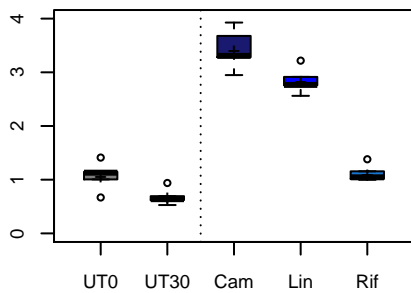**glycylleucine**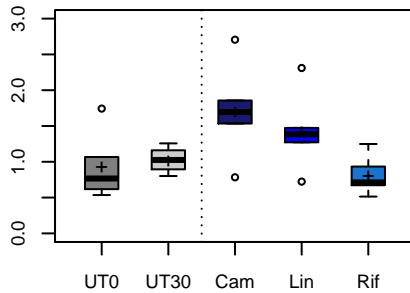**glycylproline**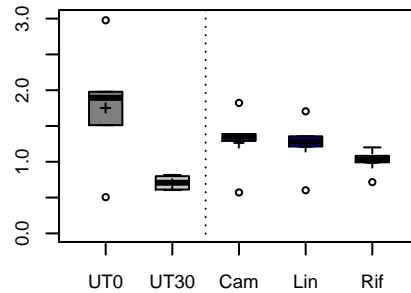**glycylvaline**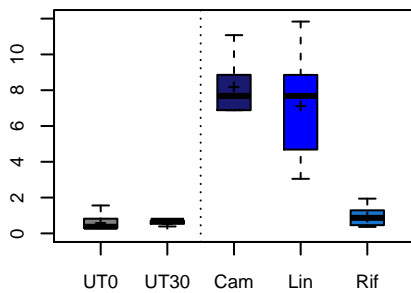**guanine**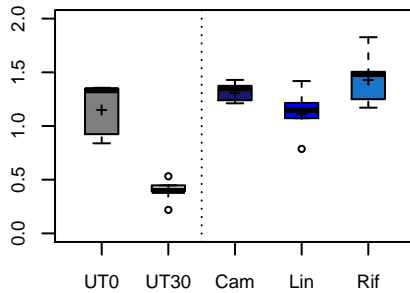**guanosine**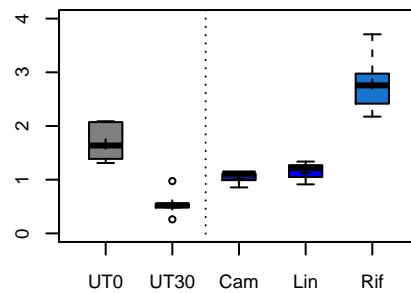

**guanosine 5'-monophosphate (5'-GMP)**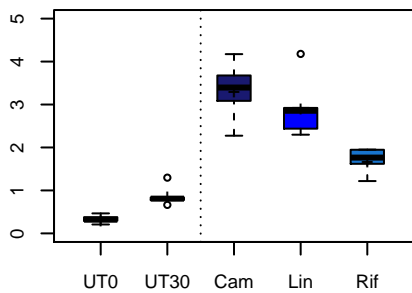**harmare**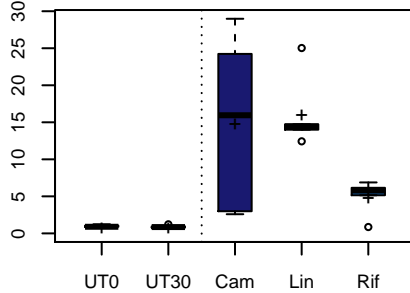**heptanoate (7:0)**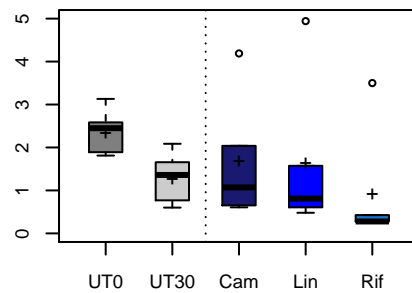**histidine**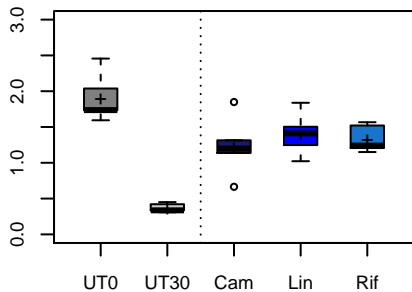**homocysteine**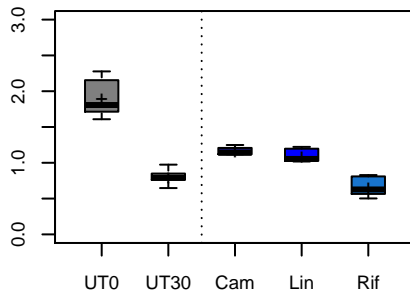**homoserine**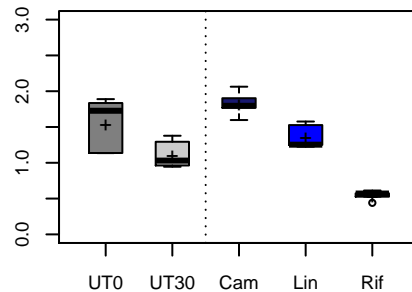**hypoxanthine**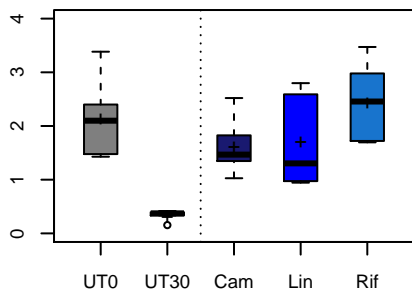**indoleacetate**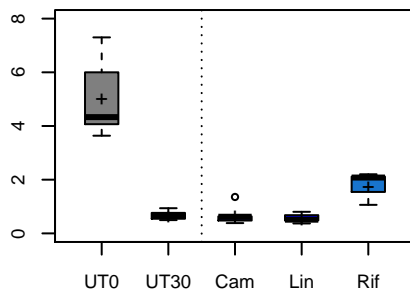**indolelactate**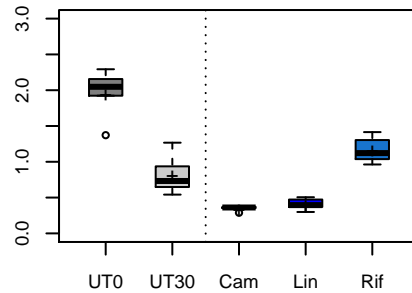**inosine**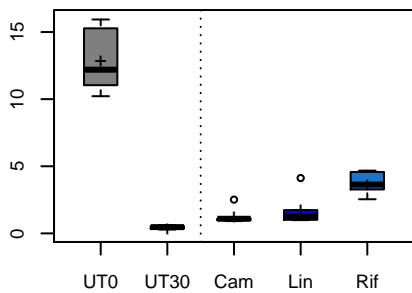**inosine 5'-monophosphate (IMP)**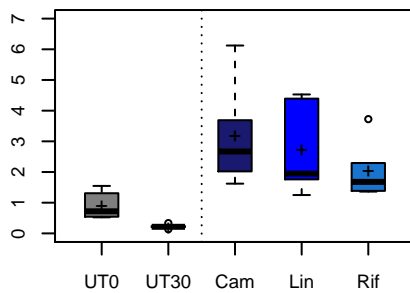**isocitrate**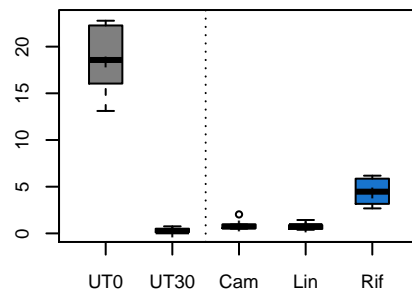**isoleucine**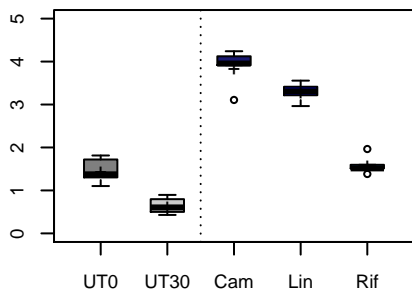**isoleucylaspartate**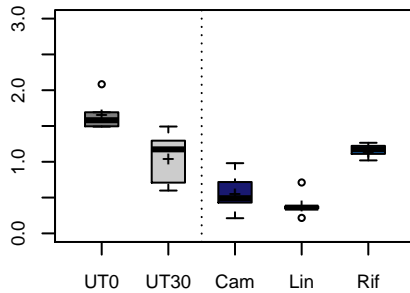**isoleucylglutamate**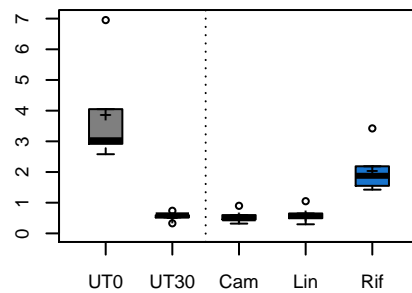



**isoleucylglutamine**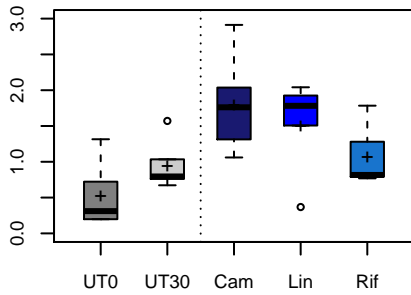**isoleucylglycine**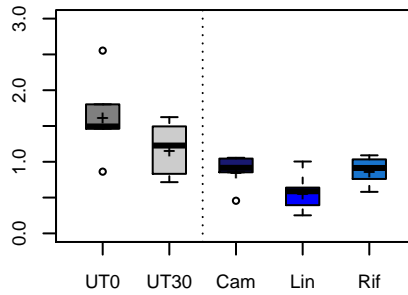**isoleucylthreonine**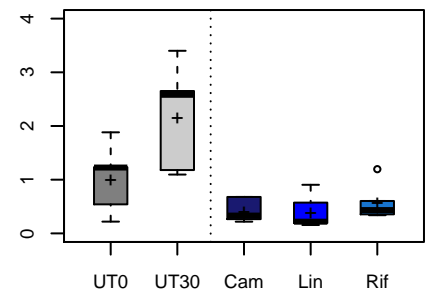**isovalerate**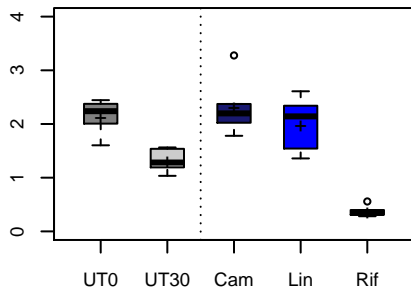**isovaleryl CoA**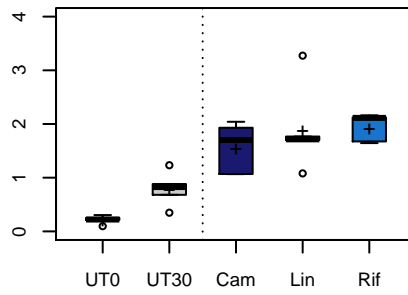**isovalerylglycine**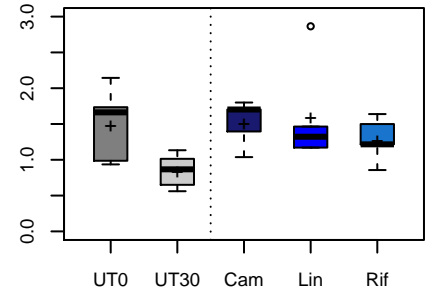**kynurenine**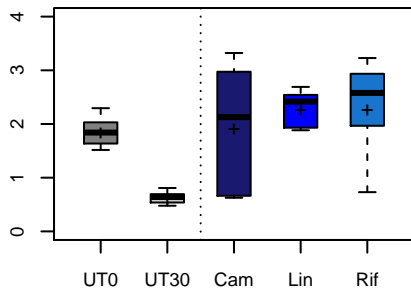**lactate**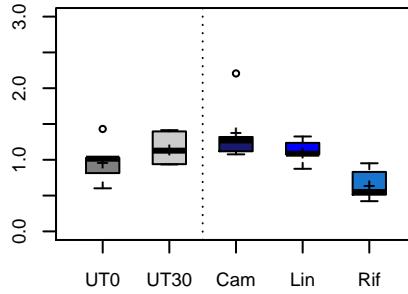**leucine**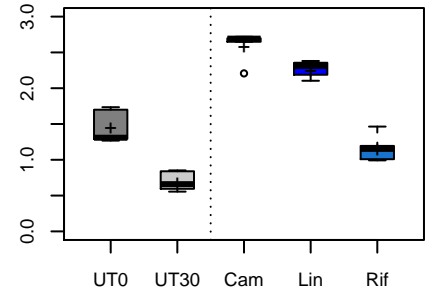**leucylglutamate**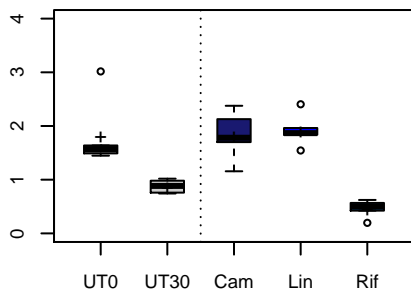**leucylglycine**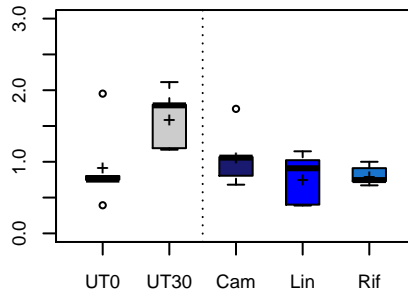**linoleamide (18:2n6)**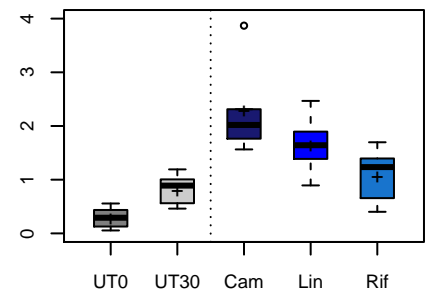**linoleate (18:2n6)**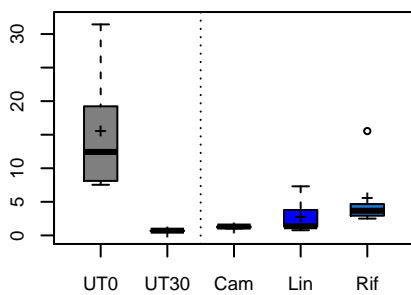**linolenate [alpha or gamma; (18:3n3 or 6)]**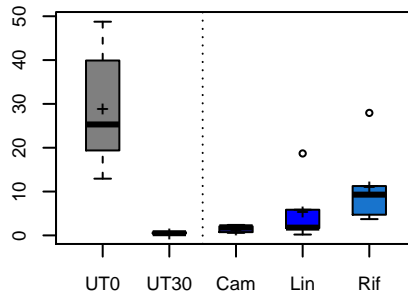**lysine**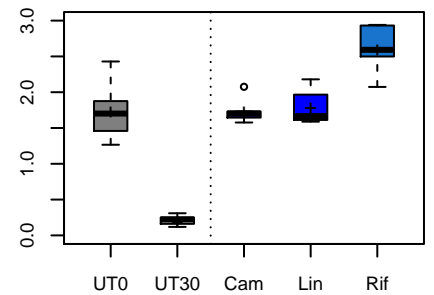

**malate**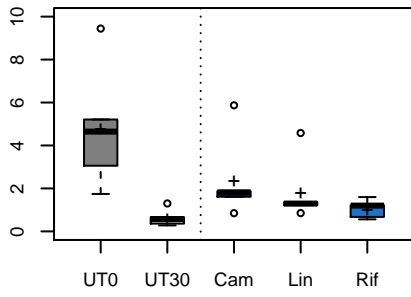**malonate (propanedioate)**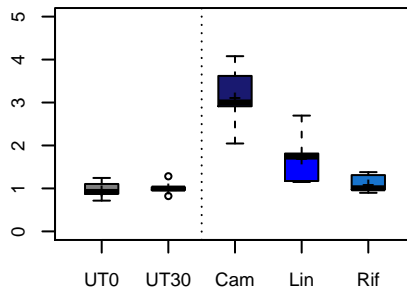**mannitol**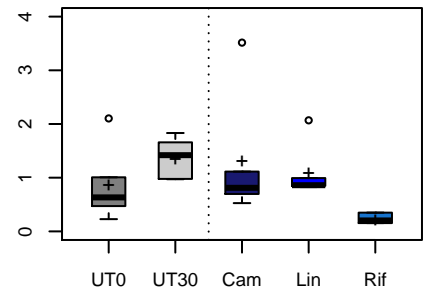**mannitol-1-phosphate**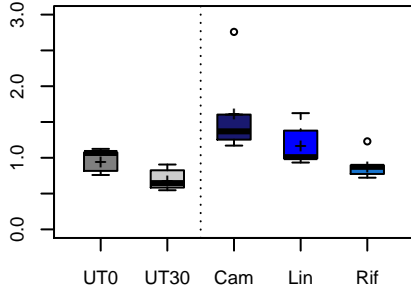**methionine**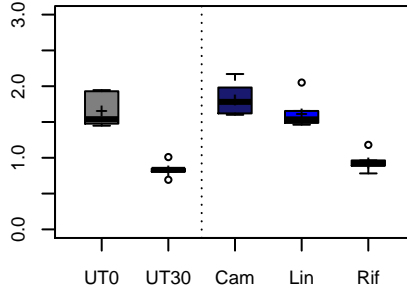**methionine sulfoxide**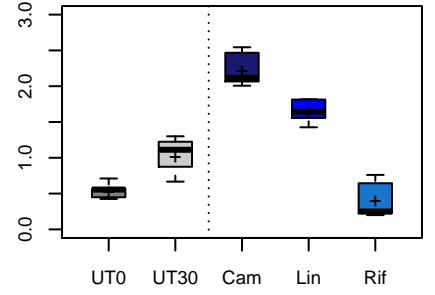**methionylglutamate**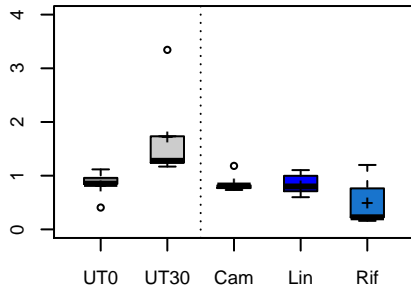**methyl indole-3-acetate**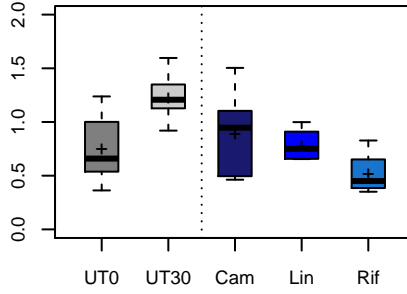**methylphosphate**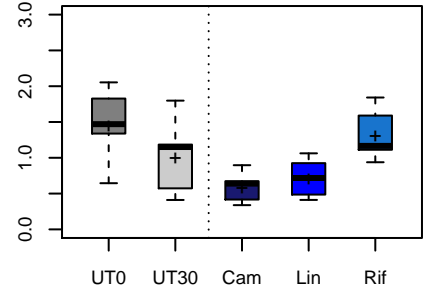**methylsuccinate**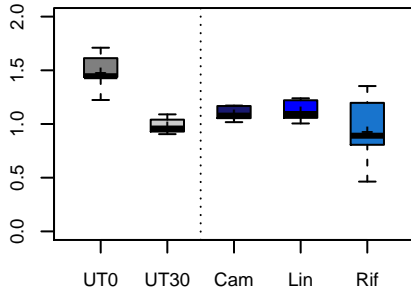**mevalonate**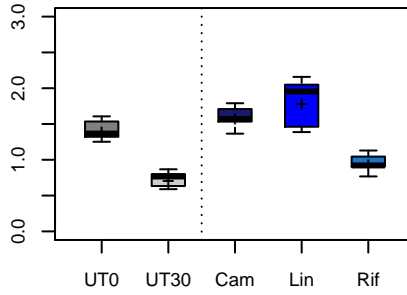**mevalonolactone**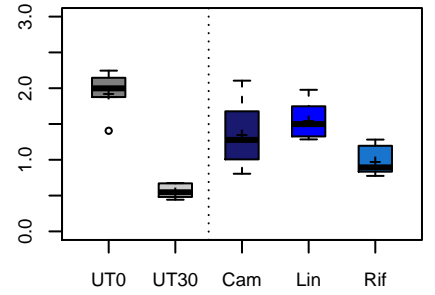**myristate (14:0)**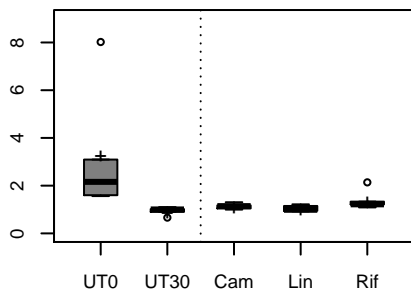**nicotinamide**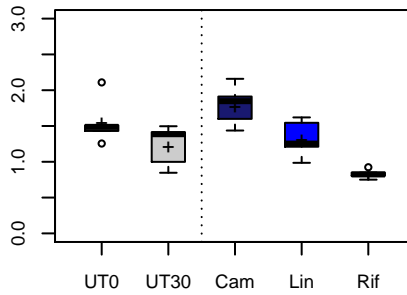**nicotinamide adenine dinucleotide (NAD+)**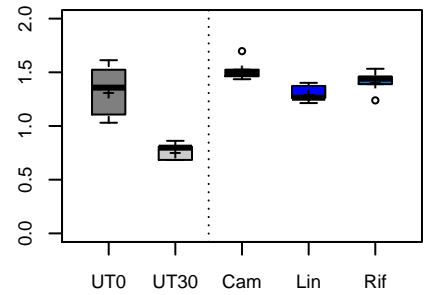

nicotinamide adenine dinucleotide reduced (NADH)

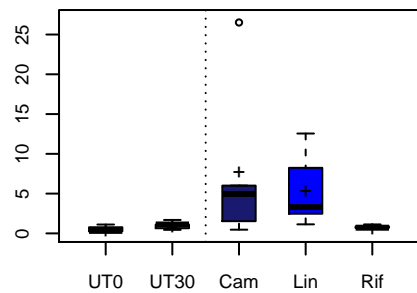

nicotinamide ribonucleotide (NMN)

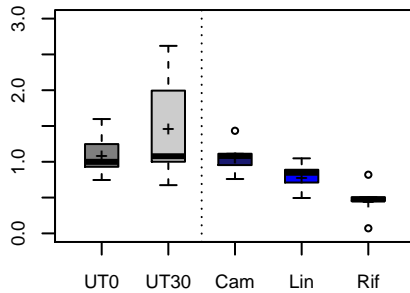

nicotinamide riboside

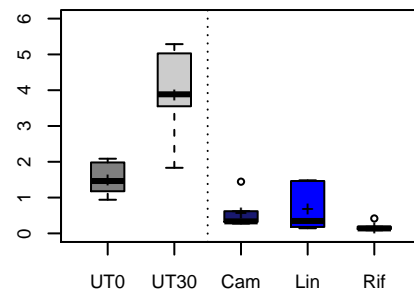

nicotinate

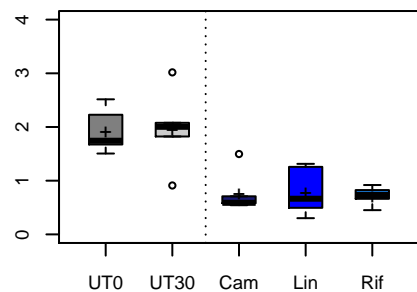

o-Tyrosine

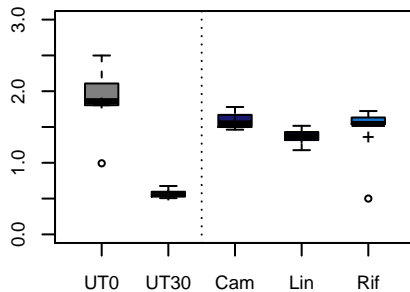

oleamide

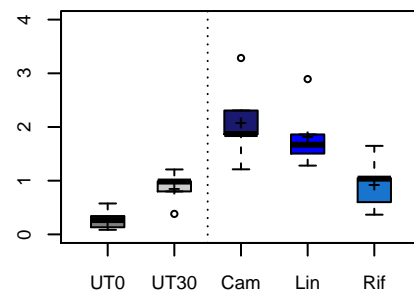

ophthalmate

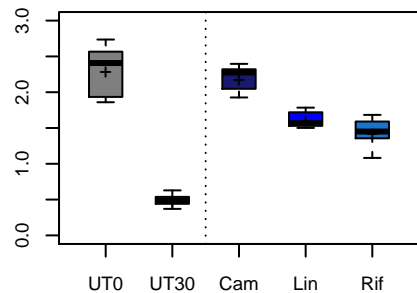

ornithine

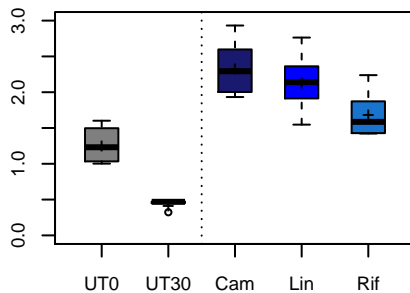

ornithine, methyl ester

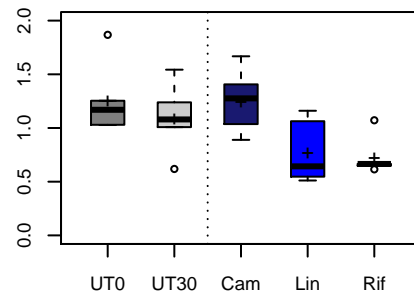

orotate

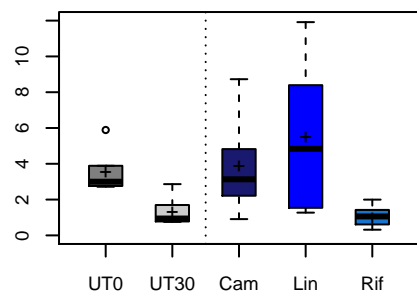

oxaloacetate

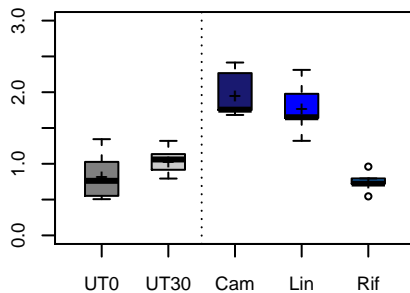

p-aminobenzoate (PABA)

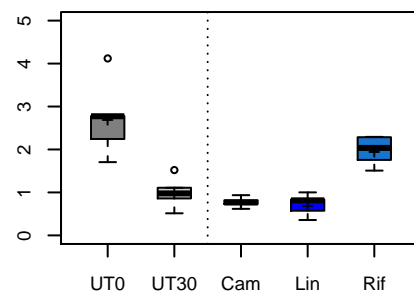

p-cresol sulfate

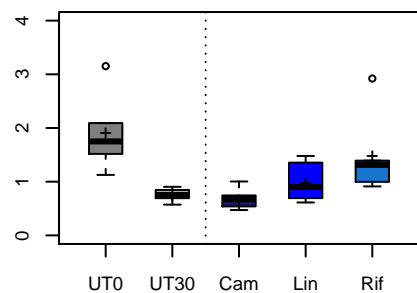

palmitate (16:0)

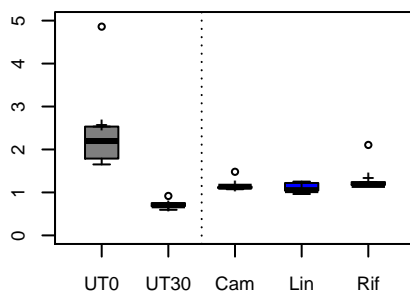

palmitic amide

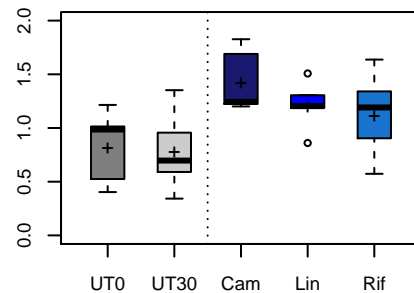

**palmitoleate (16:1n7)**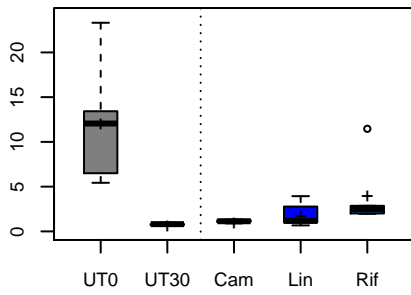**palmitoyl ethanolamide**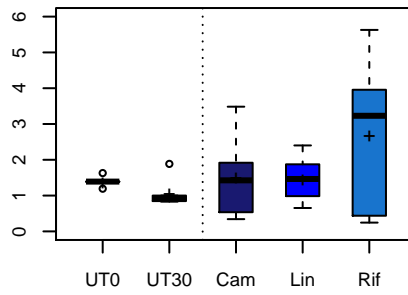**palmitoyl-oleoyl-glycerophosphoglycerol (1)\***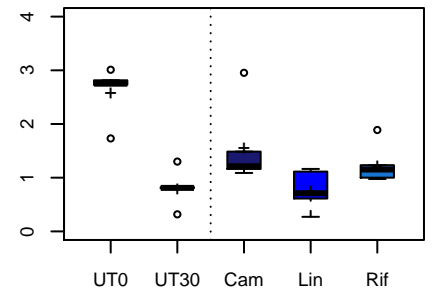**pentadecanoate (15:0)**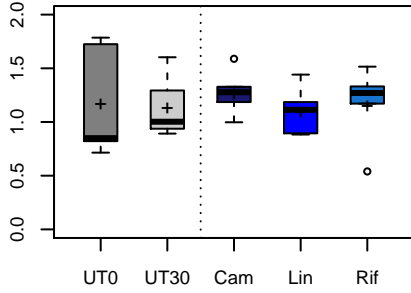**phenylacetate**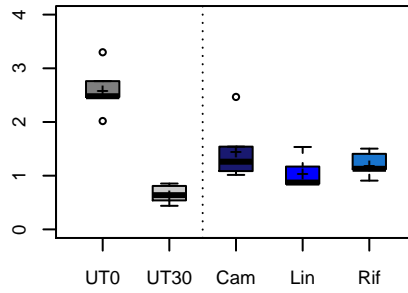**phenylalanine**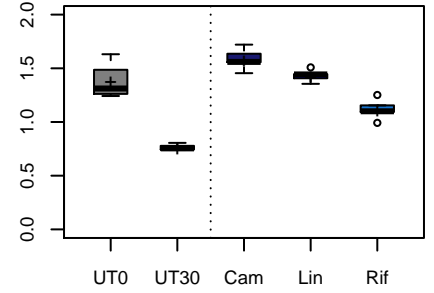**phenylalanylproline**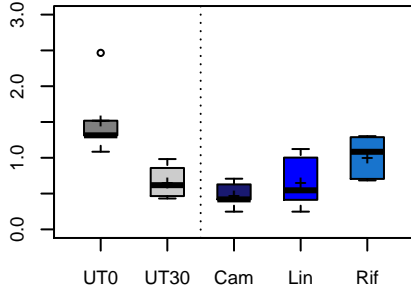**phenyllactate (PLA)**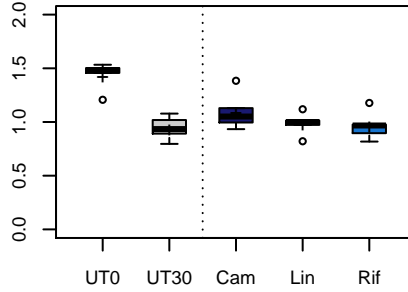**phenylpyruvate**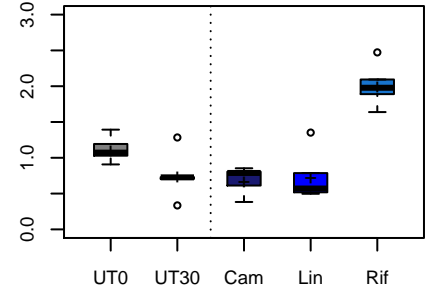**phosphate**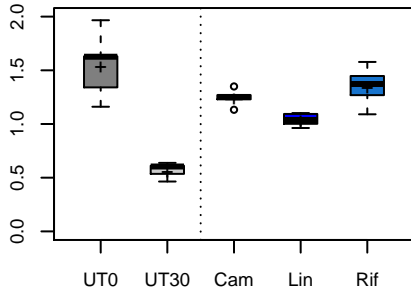**phosphoenolpyruvate (PEP)**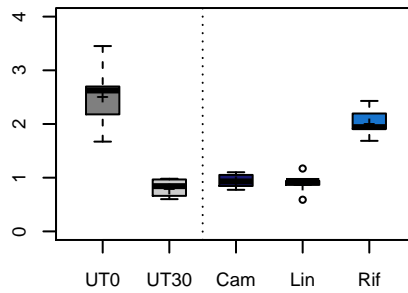**phosphopantetheine**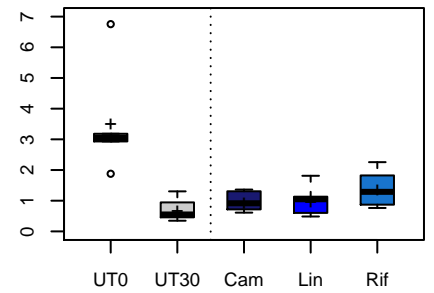**pinitol**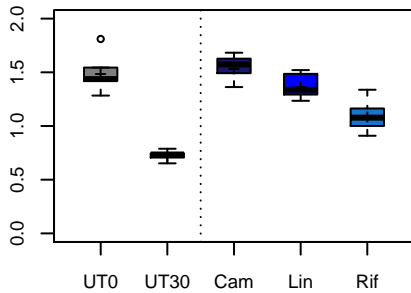**pipecolate**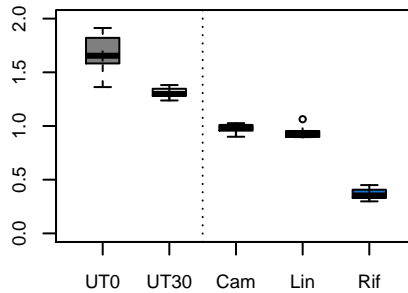**proline**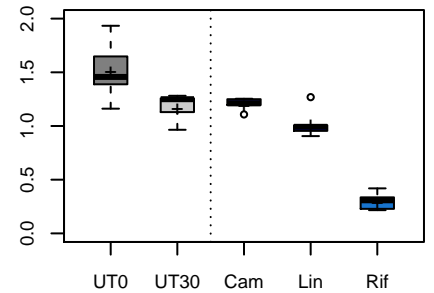

**prolylglutamate**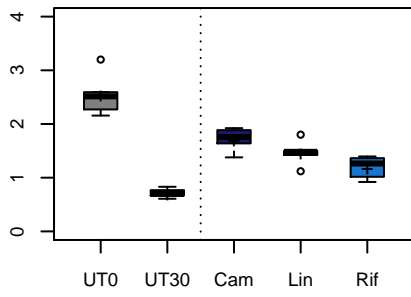**prolylglutamine**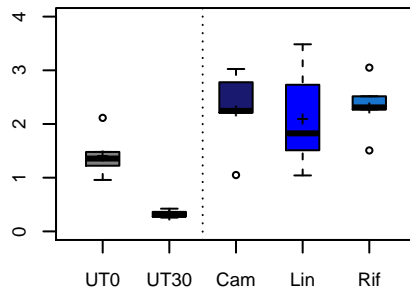**prolytyrosine**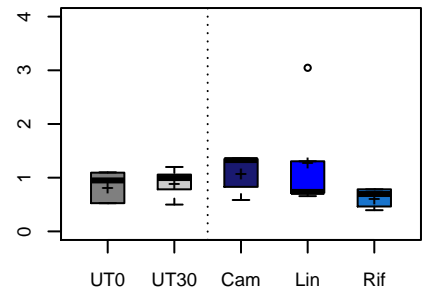**prolylvaline**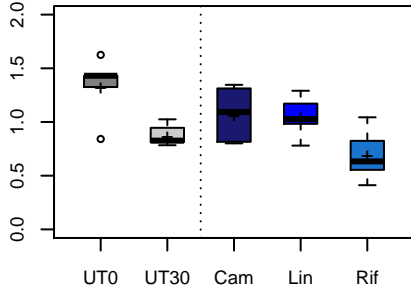**propionyl CoA**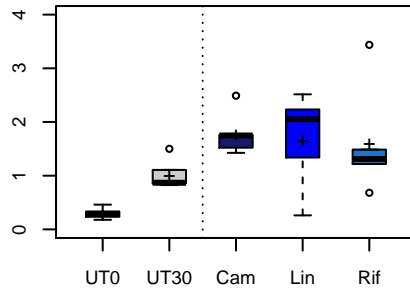**pseudouridine**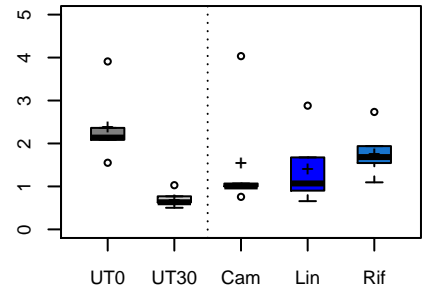**pterin**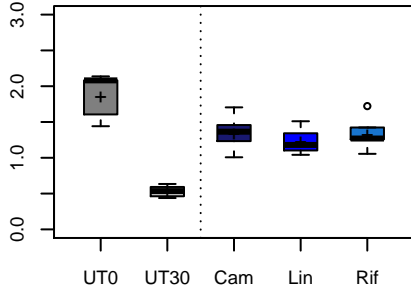**pyridoxal**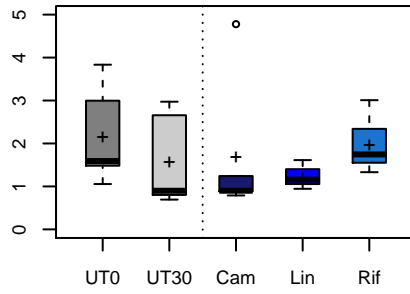**pyroglutamine\***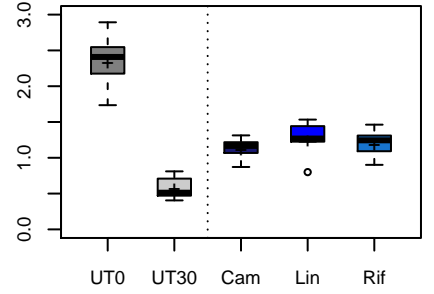**pyruvate**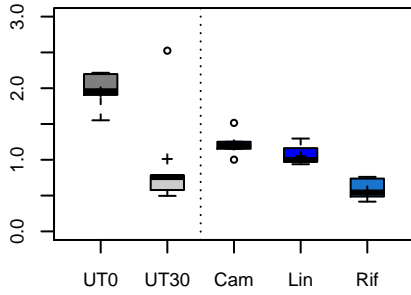**ribitol**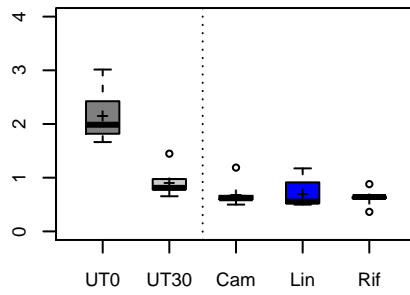**riboflavin (Vitamin B2)**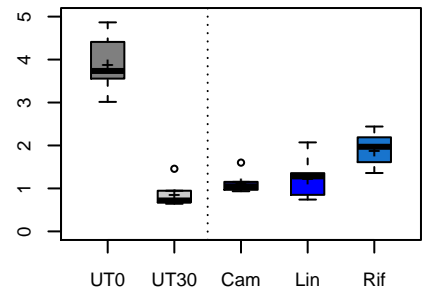**ribonate**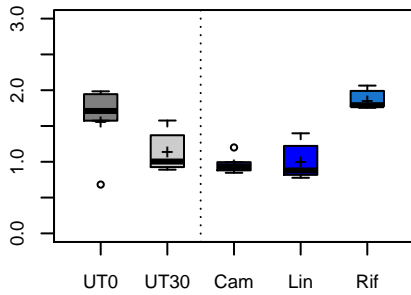**ribose**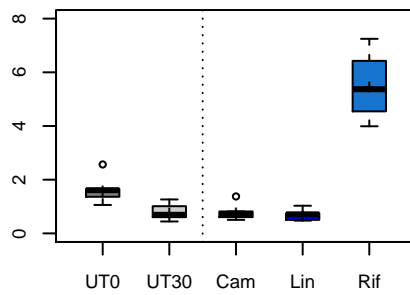**ribulose**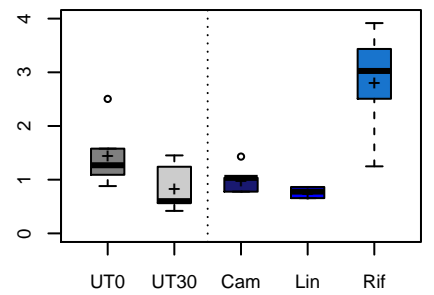

**ribose/xylulose 5-phosphate**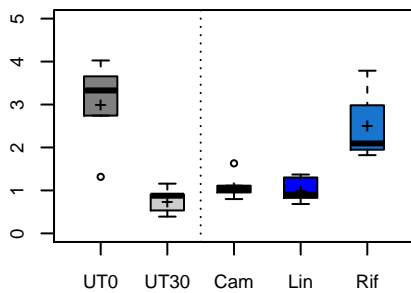**sedoheptulose-7-phosphate**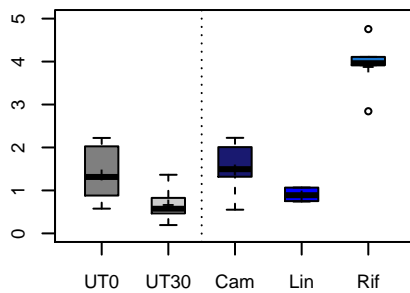**serine**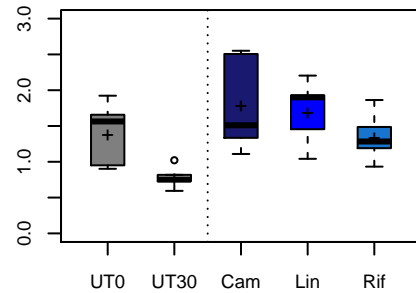**shikimate 3-phosphate**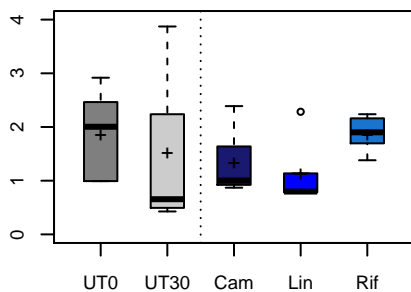**spermidine**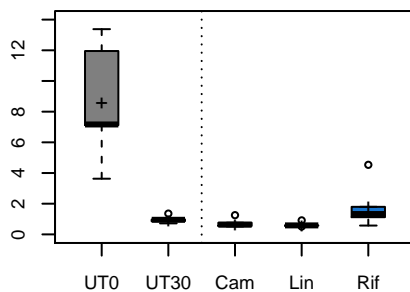**sphinganine**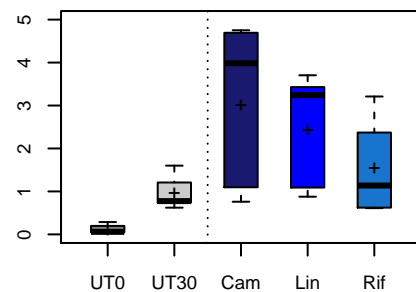**stachydrine**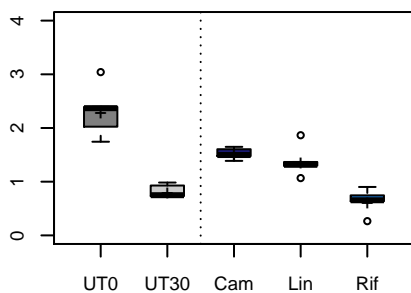**stearamide**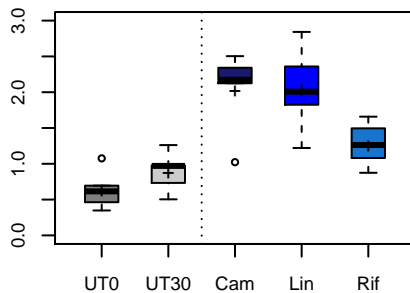**stearate (18:0)**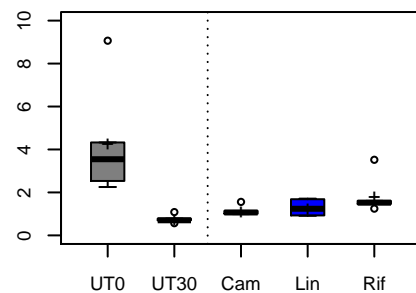**stearoyl ethanolamide**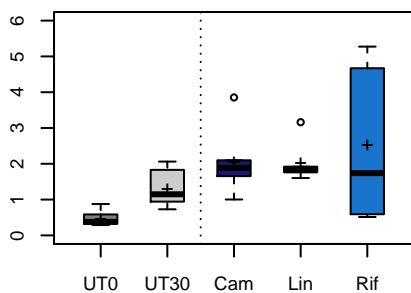**succinate**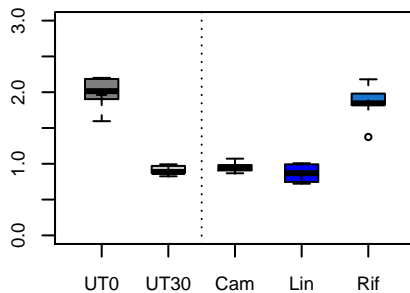**succinimide**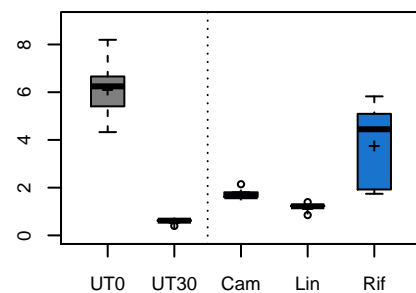**taurine**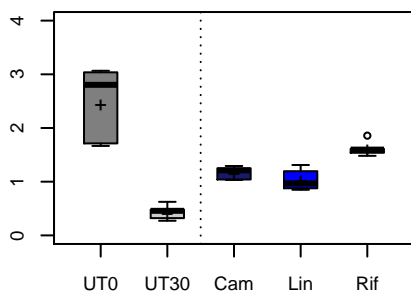**thiamin diphosphate**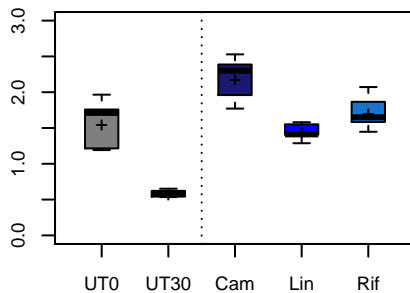**thiosulfate**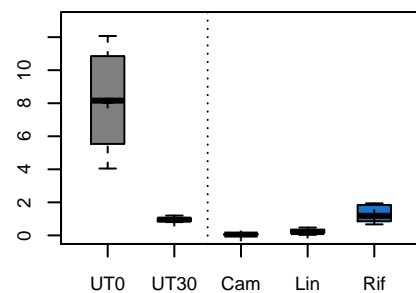

**threonate**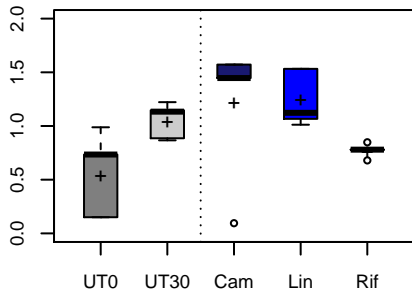**threonine**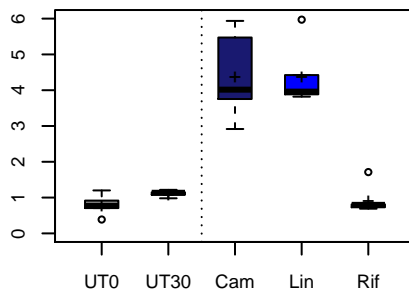**thymidine**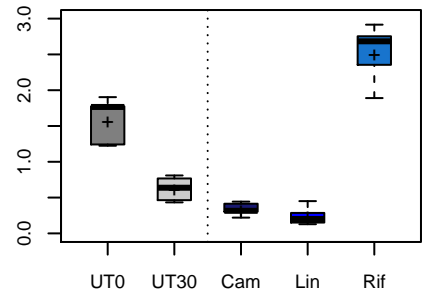**thymidine 5'-diphosphate**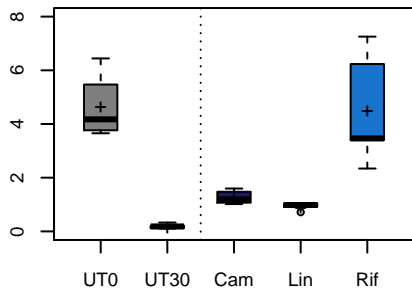**thymidine 5'-monophosphate**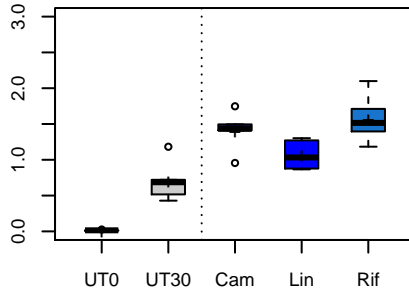**thymine**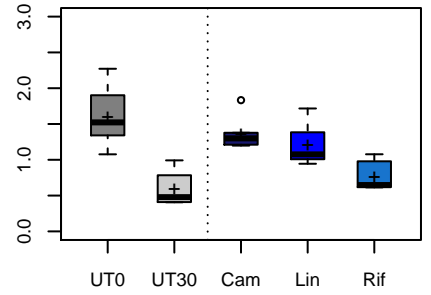**trans-urocanate**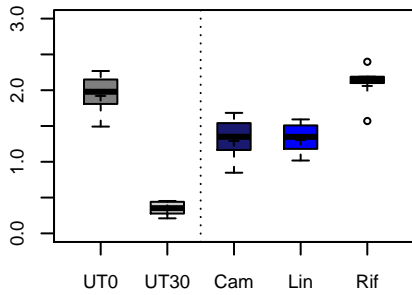**trigonelline (N-methylnicotinate)**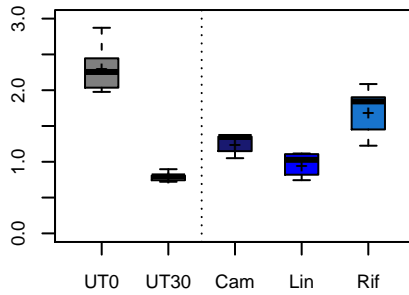**tryptophan**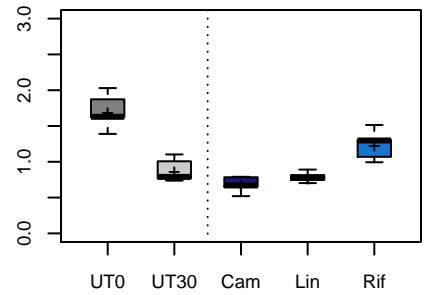**tryptophylalanine**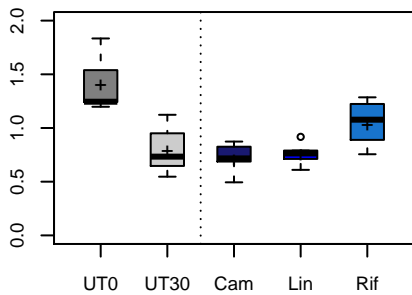**tyramine**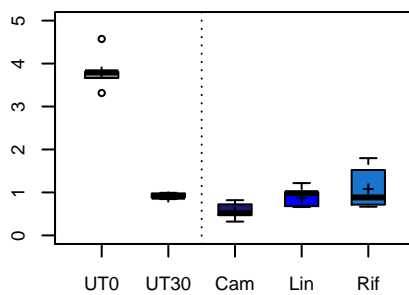**tyrosine**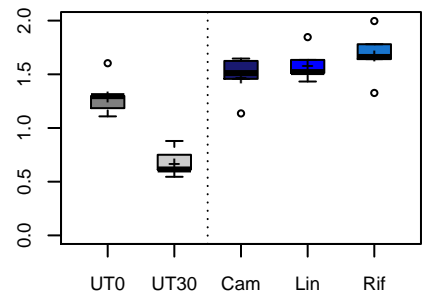**uracil**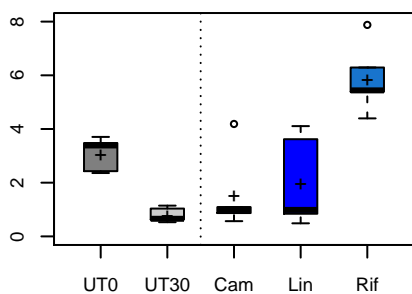**urea**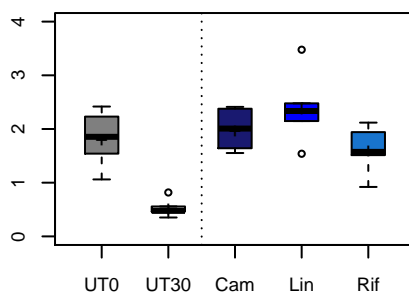**uridine**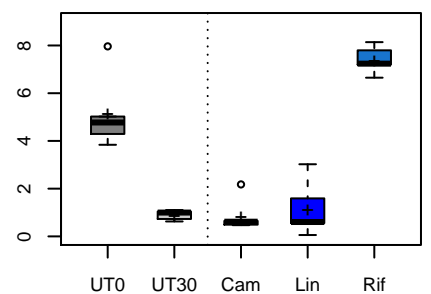

uridine 5'-diphosphate (UDP)

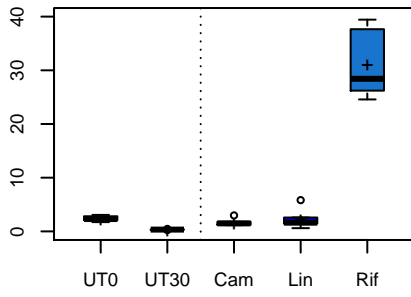

uridine 5'-monophosphate (UMP)

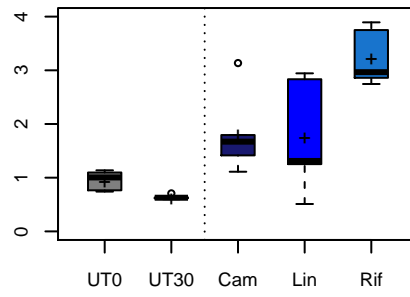

uridine 5'-triphosphate (UTP)

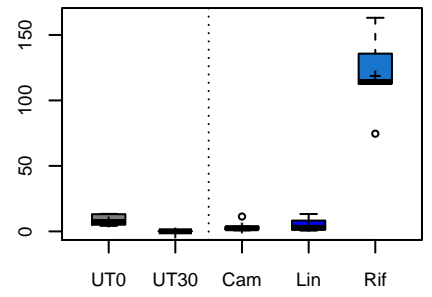

uridine-2',3'-cyclic monophosphate

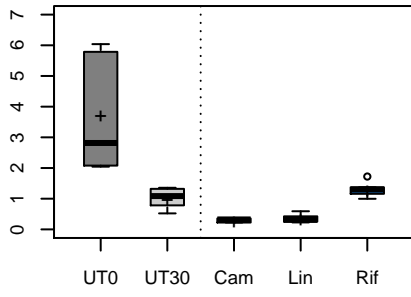

valine

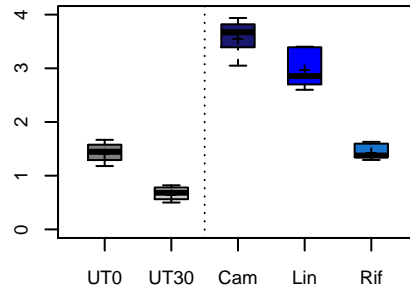

valylisoleucine

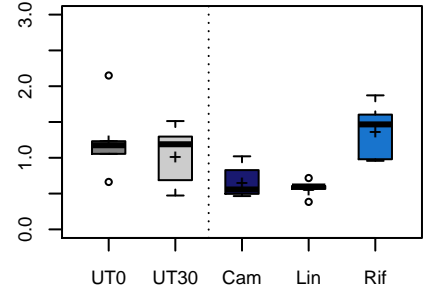

xanthosine

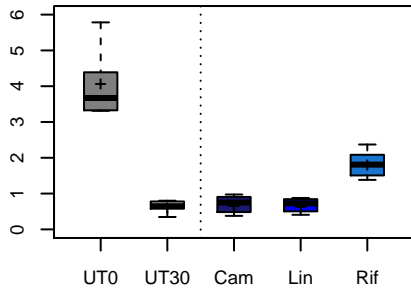

xylitol

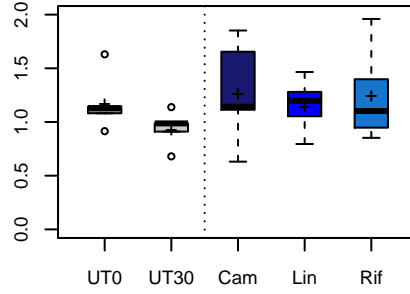

Supplement: pnas.1509743112.sfig04.pdf [file pnas.1509743112.sfig04.pdf]
