# Supplementary material
Source: PubMed Central journal article supplement (PMC4500273)
Supplement: pnas.1509743112.sfig02.pdf [file pnas.1509743112.sfig02.pdf]

# Figure S2

## A *E. coli*

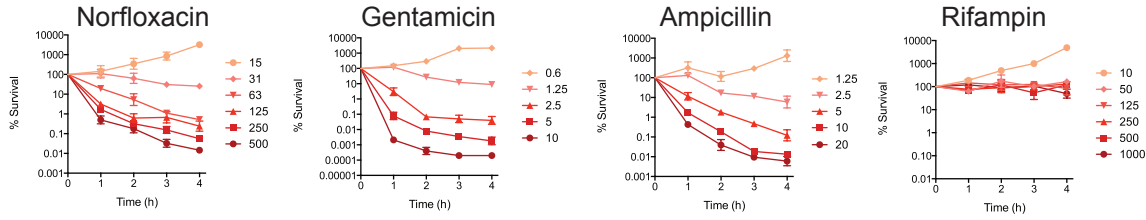

## B *S. aureus*

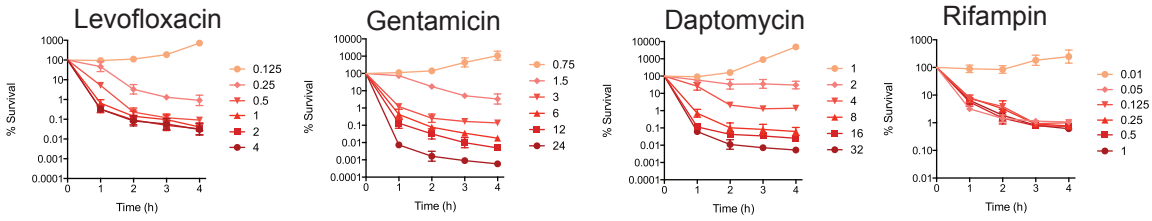

## C MICs

| <i>E. coli</i> |                     | <i>S. aureus</i> |                      |
|----------------|---------------------|------------------|----------------------|
| Ampicillin     | 2 $\mu\text{g/ml}$  | Levofloxacin     | 200 ng/ml            |
| Gentamicin     | 1 $\mu\text{g/ml}$  | Gentamicin       | 1 $\mu\text{g/ml}$   |
| Norfloxacin    | 50 ng/ml            | Daptomycin       | 1.5 $\mu\text{g/ml}$ |
| Rifampin       | 12 $\mu\text{g/ml}$ | Rifampin         | 12 ng/ml             |
