# Supplementary material
Source: PubMed Central journal article supplement (PMC4500273)

# Figure S1

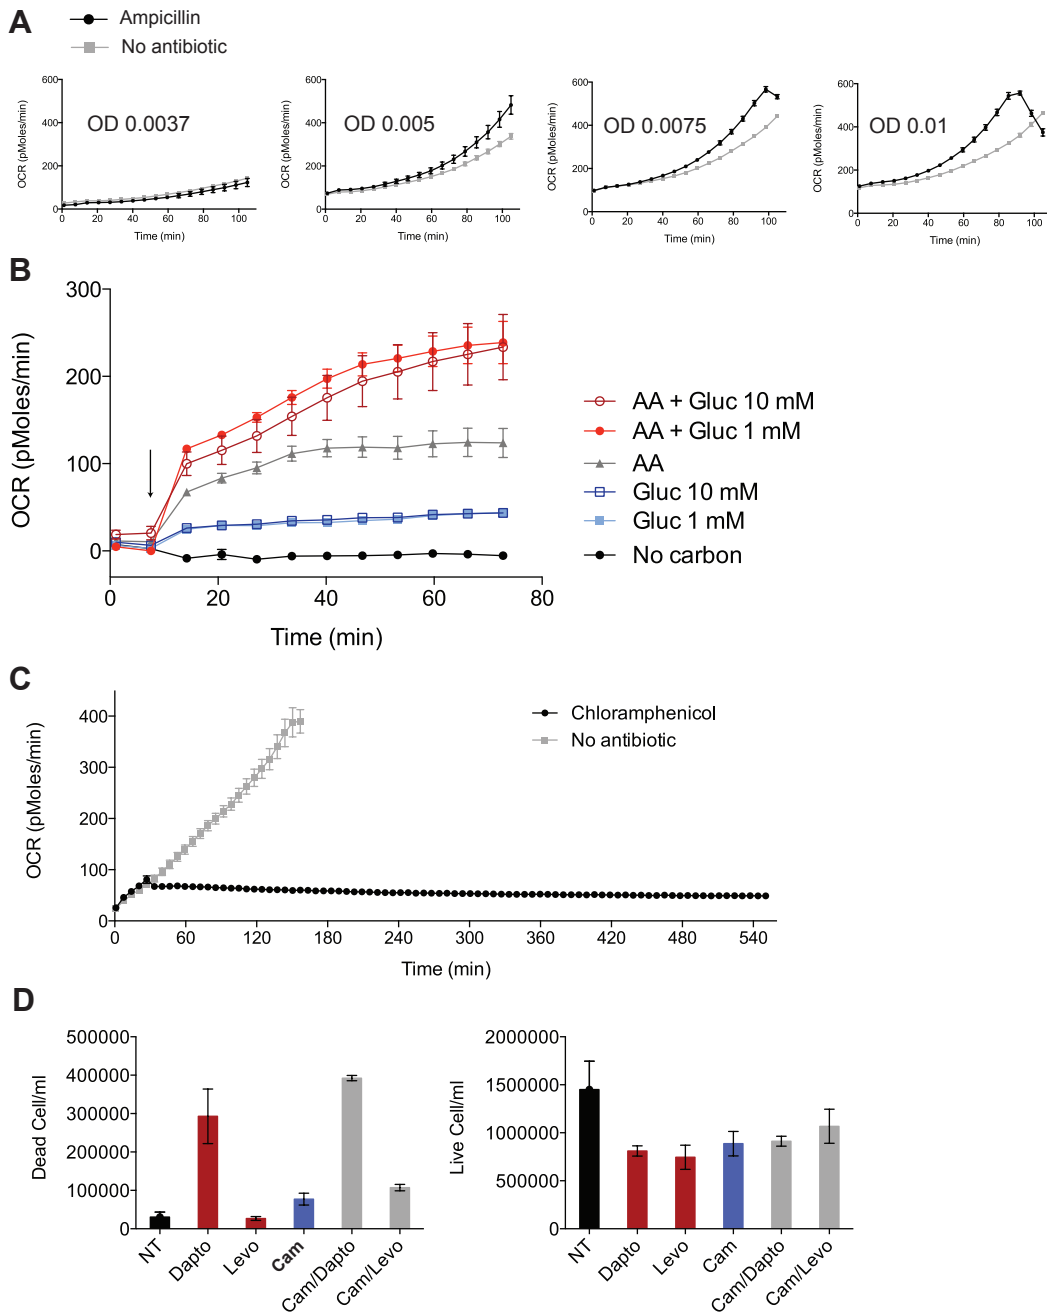

Supplement: pnas.1509743112.sfig01.pdf [file pnas.1509743112.sfig01.pdf]

**Figure S3**

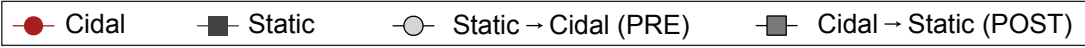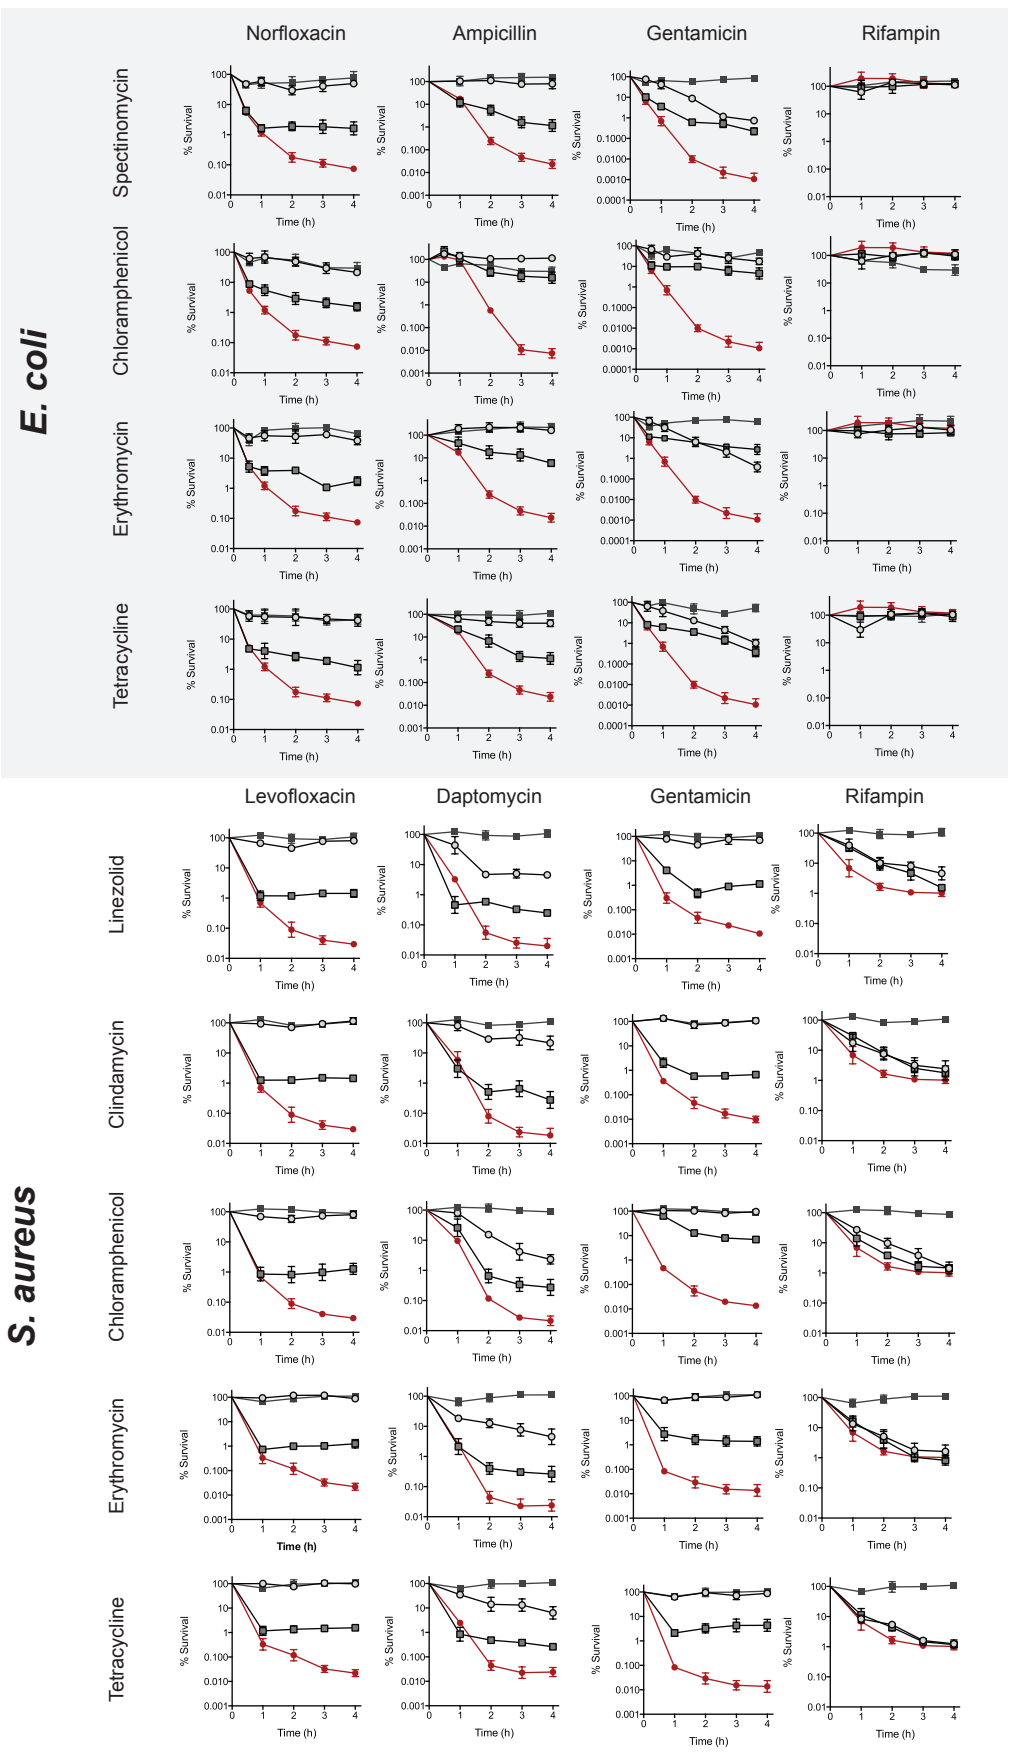

Supplement: pnas.1509743112.sfig03.pdf [file pnas.1509743112.sfig03.pdf]

**Figure S5**

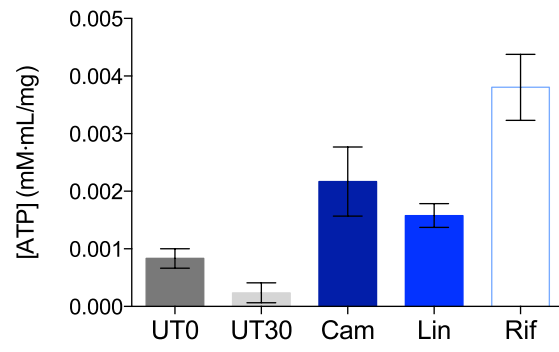

Supplement: pnas.1509743112.sfig05.pdf [file pnas.1509743112.sfig05.pdf]

Figure S6

A

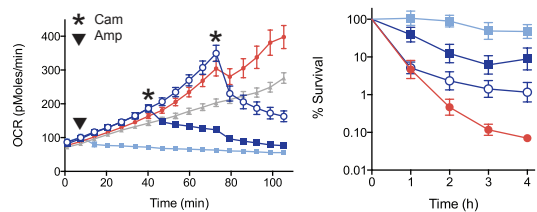

B

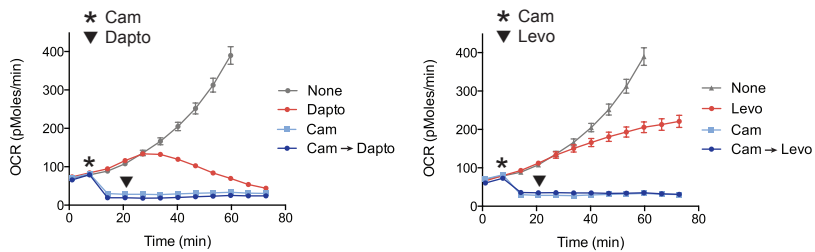

Supplement: pnas.1509743112.sfig06.pdf [file pnas.1509743112.sfig06.pdf]

Figure S7

A

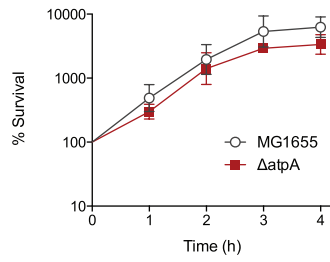

B

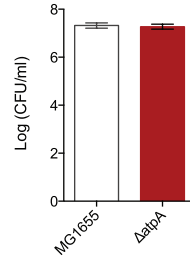

C

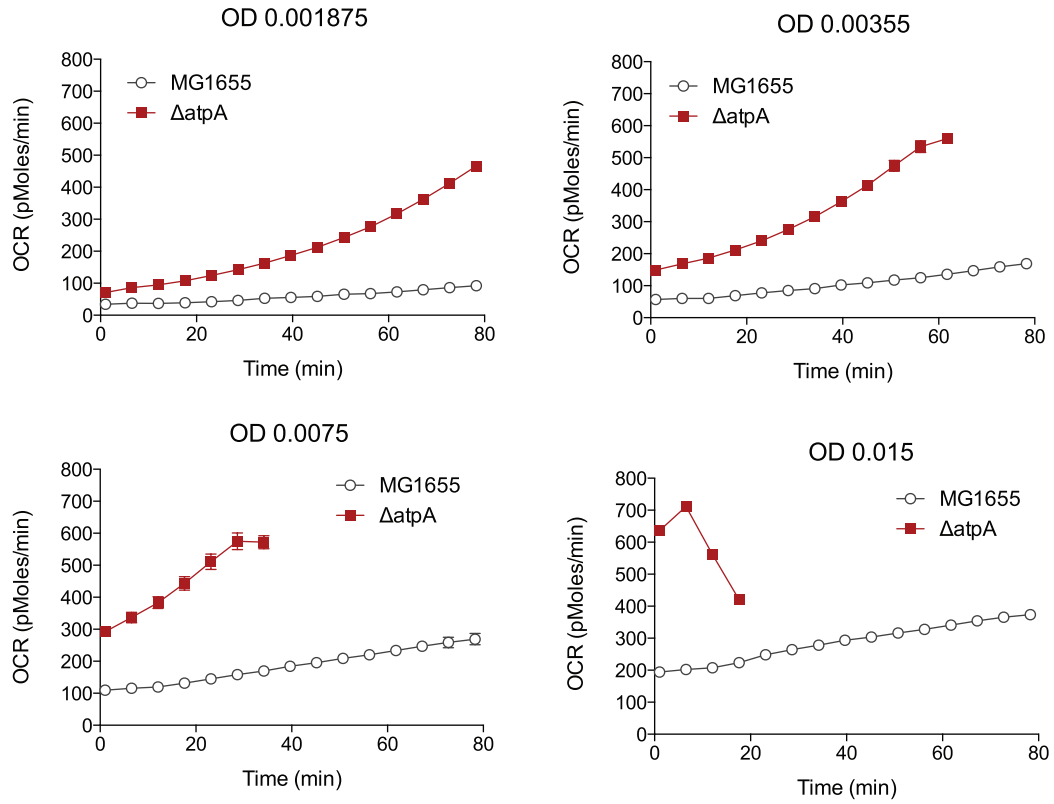

Supplement: pnas.1509743112.sfig07.pdf [file pnas.1509743112.sfig07.pdf]
